# Supplementary material for: Negatively charged platinum nanoparticles on dititanium oxide electride for ultra-durable electrocatalytic oxygen reduction
Source: Royal Society of Chemistry journal article supplement (doi:10.1039/d3ee01211e), 2023-01-01
Supplement: d3ee01211e2.pdf [file d3ee01211e2.pdf]

## Electronic Supplementary Information for

### **Negatively charged platinum nanoparticles on dititanium oxide electride for ultra-durable electrocatalytic oxygen reduction**

Erbing Hua,<sup>‡a</sup> Seunggun Choi,<sup>‡b</sup> Siyuan Ren,<sup>‡a</sup> Sungjun Kim,<sup>c</sup> Ghulam Ali,<sup>d</sup> Seon Je Kim,<sup>a</sup> Woo-Sung Jang,<sup>a</sup> Soyun Joo,<sup>e</sup> Jingshu Zhang,<sup>e</sup> Seulgi Ji,<sup>f</sup> Yun Seong Cho,<sup>g</sup> Jooheon Kang,<sup>g</sup> Taeseup Song,<sup>b</sup> Seungbum Hong,<sup>e</sup> Heechae Choi,<sup>f,h</sup> Young-Min Kim,<sup>a</sup> Hyuksu Han<sup>\*i</sup> and Sung Wng Kim<sup>\*a</sup>

<sup>a</sup>Department of Energy Science, Sungkyunkwan University; Suwon 16419, Republic of Korea.

<sup>b</sup>Department of Energy Engineering, Hanyang University; Seoul 04763, Republic of Korea.

<sup>c</sup>Hydrogen Energy Research Center, Korea Research Institute of Chemical Technology; Daejeon, Republic of Korea.

<sup>d</sup>U.S.-Pakistan Center for Advanced Studies in Energy (USPCASE), National University of Sciences and Technology (NUST), Sector H-12, Islamabad, Pakistan.

<sup>e</sup>Department of Materials Science and Engineering, KAIST; Daejeon, Republic of Korea.

<sup>f</sup>Institute of Inorganic Chemistry, University of Cologne, Greinstr. 6, 50939, Cologne, Germany.

<sup>g</sup>School of Advanced Materials Science and Engineering, Sungkyunkwan University; Suwon 16419, Republic of Korea.

<sup>h</sup>Department of Chemistry, Xi'an Jiaotong-Liverpool University, Suzhou, Jiangsu, 215123, China.

<sup>i</sup>Department of Energy Engineering, Konkuk University; Seoul 05029, Republic of Korea.

<sup>‡</sup>These authors contributed equally to this work

\*Email: [hhan@konkuk.ac.kr](mailto:hhan@konkuk.ac.kr) (H.H.) and [kimsungwng@skku.edu](mailto:kimsungwng@skku.edu) (S.W.K.)

## Supplementary Experimental

### Synthesis of $[\text{Ti}_2\text{O}]^{2+}\cdot 2\text{e}^-$ electride

All synthetic part were operated in glove boxes filled with high-purity argon gas (Ar 99.999%) to minimize the oxidation of raw materials and synthesized samples. Stoichiometric polycrystalline  $[\text{Ti}_2\text{O}]^{2+}\cdot 2\text{e}^-$  electriles were synthesized by the arc melting method under high-purity Ar atmosphere. We mixed Ti powder (Alfa Aesar; 99.98%) and  $\text{TiO}_2$  in a 2:1 molar ratio of Ti to O. To collect homogeneous and single phase of  $[\text{Ti}_2\text{O}]^{2+}\cdot 2\text{e}^-$  electriles via the arc melting method, mixed powder was pelletized under 20 MPa. The pellets were melted in the Ar-filled arc melting chamber over 2000 °C and remelted to fabricate polycrystalline coin-shaped  $[\text{Ti}_2\text{O}]^{2+}\cdot 2\text{e}^-$  electride samples. Coin-shaped polycrystals were pulverized for structural characterization and used as the working electrode in electrochemical experiments.

### Synthesis of ea-Pt/a- $\text{TiO}_x/[\text{Ti}_2\text{O}]^{2+}\cdot 2\text{e}^-$

The deposition of Pt NPs onto  $\text{Ti}_2\text{O}$  was conducted by wet-chemical infiltration methods in combination with *in situ* electrochemical reduction process.<sup>1</sup> 5 mg of the pulverized  $\text{Ti}_2\text{O}$  powder was dipped into the 353  $\mu\text{L}$  of aqueous 8 mM  $\text{PtCl}_4$  (Sigma Aldrich; 98%) solution. Pt/ $\text{Ti}_2\text{O}$  was obtained after the evaporation of the water solvent in vacuum oven at 80 °C. Electrochemical activation process was then performed by applying continuous potential of 0.4 V vs. reversible hydrogen electrode (RHE) for 1 h using a potentio station, leading to the complete reduction of  $\text{PtCl}_4$  and the formation of negatively charged Pt NPs on the  $[\text{Ti}_2\text{O}]^{2+}\cdot 2\text{e}^-$  electride surface.

### Structural characterization by XRD

The crystal structure was investigated by XRD using a Rigaku SmartLab diffractometer with monochromatic  $\text{Cu K}\alpha$  radiation (8.04 keV) at room temperature. The well-ground powder samples were prepared in glove boxes and measured in a plastic dome-type stage filled with Ar gas to avoid oxidation during measurements. General Structure Analysis System (GSAS) software package was applied to perform Rietveld refinement. To confirm the effect of oxidation to the crystal structure of the  $[\text{Ti}_2\text{O}]^{2+}\cdot 2\text{e}^-$  electride, we prepared unoxidized powder handled in Ar-filled glove boxes and oxidized powder neglected in the air and water over 3 months. Then, the same XRD measurement procedures were conducted for each sample. The Ar-exposed sample was prepared in glove boxes filled with high-purity Ar gas by cutting and pulverizing to make fresh surfaces.

### Electrical transport measurements and characterization

The resistivity and Hall effect measurements were performed to confirm the oxidation effects on the electrical properties. Three different samples, which are cleaved in the glove boxes (UHV-cleaved), exposed to air for 1 month (air-exposed), and immersed in the water for 1 month (water-exposed), were prepared and Au was deposited as electrodes with a thermal evaporator equipped in a glove box onto the surface of the samples to eliminate the noise from contact resistance with four-point and Hall bar configurations. After the contacts were made, Apiezon N grease was coated onto the sample surfaces to prevent further oxidation during measurements. The temperature-dependent resistivity and Hall effect measurements were performed by the physical property measurement system (PPMS DynaCool, Quantum Design). The carrier concentrations ( $N_{\text{H}}$ ) were derived from the Hall coefficient ( $R_{\text{H}}$ ). The measured sample in the inset of Fig. S28b was prepared in a glove box filled with high-purity Ar gas by cleaving and polishing to make a fresh surface.

### **Photoemission spectroscopy measurements and characterization**

A XPS and UPS measurements were performed to investigate chemical and electronic states of  $[\text{Ti}_2\text{O}]^{2+}\cdot 2\text{e}^-$  electrified surface. To investigate into the as-prepared bulk information and avoid the disturbance of surface species, we cleaved the shiny surface of the  $[\text{Ti}_2\text{O}]^{2+}\cdot 2\text{e}^-$  electrified (air-exposed sample) with Argon (Ar) plasma sputtering was operated under maximum power for 12 hours to remove the surface substance on as-prepared samples (4 mm  $\times$  4 mm  $\times$  0.5 mm shiny plate), under ultrahigh vacuum (UHV) conditions ( $\sim 10^{-10}$  torr) with a post attached Torr Seal before photoemission spectroscopy measurements. Then, the measurement was carried out under a vacuum of ca.  $3 \times 10^{-10}$  torr. The photoemission results were obtained using a Scienta R4000 electron analyzer with an Al  $K_\alpha$  X-ray source (1486.7 eV) and a discharge lamp that emitted an excitation line of He  $I_\alpha$  (21.2 eV). Core spectra of Ti 2p and O 1s were measured for analysis, and all spectra were fitted by comparing the binding energies of the component peaks with CasaXPS. Every peak was calibrated by the spectrum of hydrocarbon on the sample and reference Au attached next to the sample. In the work function ( $\phi$ ) measurement with UPS, the negative bias voltage of 1 kV was applied to clarify that the vacuum level of the sample exceeds that of an electron analyzer. Pt 4f XPS spectra was also measured for Pt/a-TiO<sub>x</sub>/[Ti<sub>2</sub>O]<sup>2+</sup>·2e<sup>-</sup> and ea-Pt/a-TiO<sub>x</sub>/[Ti<sub>2</sub>O]<sup>2+</sup>·2e<sup>-</sup> samples.

### **Atomic-scale transmission electron microscopy**

TEM experiments were performed using a Cs-corrected TEM (JEM-ARM200F, JEOL) equipped with a cold field emission source, operating at 200 kV. To prevent oxidation of the TEM sample, a single-tilt vacuum transfer holder (Model VTST-4006, Gatan) was used for TEM experiments (UHV-cleaved samples). TEM samples for HRTEM and EDX were prepared as powder cleaved from a single phase polycrystal in the high-purity Ar-filled glove boxes. Air-/water-exposed samples was collected from the samples exposed to air and water for 3 months and prepared the specimen for TEM in above glovebox. Dual-beam focused ion beam (AURIGA CrossBeam Workstation, Carl Zeiss) was also used to obtain atomic-scale STEM images and chemical EDX mapping data with JEOL-EDX in the STEM imaging mode, and each detector has an effective detection area of 100 mm<sup>2</sup>. The sample drift during the acquisition was compensated by tracking the reference atom position assigned at the beginning of the acquisition.

### **X-ray absorption spectroscopy**

Hard X-ray absorption spectroscopy (XAS) was performed using Si(111) double crystal monochromator at 1D beamline of Pohang accelerator spectroscopy (PAL) and 8C beamlines of the Pohang accelerator laboratory, South Korea. A double crystal monochromator (DCM) Si(111) was employed at 1D beamline and measurements were taken with a ring current of 300 mA. The harmonics of the incident X-ray beam were detuned by DCM. The energy was calibrated using reference metallic foils prior to measurements. The XAS data of samples were obtained in transmission mode using a Pt metallic foil as reference. The background removal, normalization, and Fourier transform of the obtained signals were processed in the ATHENA package.<sup>2</sup>

### **Inductively coupled plasma optical emission spectroscopy**

Pt amount in the samples were measured by inductively coupled plasma-optical emission spectroscopy (ICP-OES, Thermo Scientific, iCAP6500 Duo). RF power was set as 1350 W and the wavelength was 214.423 nm.

## Preparation of catalyst inks and electrodes

5 mg of the catalyst powders and 5 mg of super P (Thermo Scientific; 99%) were dispersed in a mixture of 0.5 mL of DI water and 0.44 mL of 2-propanol (Sigma Aldrich; 99%) containing 60  $\mu\text{L}$  of Nafion 117 solution (Sigma Aldrich; ~5%) by sonicating and stirring for more than 30 min. 11.2  $\mu\text{L}$  of the dispersed catalyst ink was loaded onto a glassy carbon electrode with a diameter of 5 mm resulting in a catalyst loading amount of approximately  $\sim 0.28 \text{ mg cm}^{-2}$ . For comparison purpose, the benchmark commercial Pt/C (Sigma Aldrich; 20 wt.%) catalyst was also prepared using the identical recipe.

## Electrochemical characterization

Aqueous 0.1 M KOH (Daejung; 93%) solution was implemented as an electrolyte under 50 sccm of  $\text{O}_2$  purging. Typical three electrode cell controlled by an electrochemistry workstation (model Autolab PGSTAT; Metrohm) was used for all the electrochemical characterizations. Pt sheet and Ag|AgCl were used as counter and reference electrodes, respectively. A titration vessel of clear glass was used as a testing cell. A rotating disk electrode (RDE) was used for all electrochemical tests. The distance between working and reference electrodes was about 1 cm. Catalysts were stabilized over 100 cycles of cyclic voltammetry in the potential window, 0.05 – 1.18  $V_{\text{RHE}}$ . LSV curves were then measured from 1.1  $V_{\text{RHE}}$  to 0.4  $V_{\text{RHE}}$  at a scan rate of 5  $\text{mV s}^{-1}$  using 2,500 rpm. All polarization curves were iR-compensated using solution resistance ( $R_s$ ) values measured by electrochemical impedance spectroscopy (EIS) over the frequency range of 0.1 – 100 kHz under open circuit voltage (OCP). For chronoamperometry test, carbon paper was used as a substrate where the catalysts was loaded with the same loading density,  $0.28 \text{ mg cm}^{-2}$ .

## Pt electrochemical surface area (ECSA) and specific activity determination via cyclic voltammetry (CV)

CVs were conducted for the non-faradaic region (0.025  $V_{\text{RHE}}$  – 1.225  $V_{\text{RHE}}$ ) in 0.1 M  $\text{HClO}_4$  to calculate the ECSA of the samples. H adsorbs on the surface before the potential reaches 0  $V_{\text{RHE}}$ . This is called hydrogen underpotential deposition ( $\text{H}_{\text{upd}}$ ) which can be calculated by integrating CV data. Current by capacitance of the catalysts should be excluded when the integration is conducted. ECSA can be calculated by the following equation:

$$\text{ECSA}_{\text{Pt,cat}} (\text{m}^2 \text{g}_{\text{Pt}}^{-1}) = \frac{Q_{\text{H-adsorption}} (\text{C})}{210 \mu\text{C cm}_{\text{Pt}}^{-2} L_{\text{Pt}} (\text{mg}_{\text{Pt}} \text{cm}^{-2}) A_{\text{g}} (\text{cm}^2)} \times 10^5$$

where  $\text{ECSA}_{\text{Pt,cat}}$  is ECSA of the corresponding sample,  $Q_{\text{H-adsorption}}$  is the hydrogen adsorption charge,  $L_{\text{Pt}}$  is Pt mass loading, and  $A_{\text{g}}$  is the geometrical surface area of the electrode. Assumption that H atoms are adsorbed on only Pt atoms was made here. Conversion factor  $Q_{\text{H}} = 210 \mu\text{C cm}^{-2}$  is the charge of full coverage for clean polycrystalline Pt.<sup>3</sup> Specific activity is calculated determined via the following equation:

$$\text{Specific activity} (\text{mA cm}_{\text{Pt}}^{-2}) = \frac{\text{Current density} (\text{mA cm}^{-2})}{\text{ECSA}_{\text{Pt,cat}} (\text{m}^2 \text{g}_{\text{Pt}}^{-1}) L_{\text{Pt}} (\text{mg}_{\text{Pt}} \text{cm}^{-2})} \times 10$$

## Calculation of mass activity

When calculating mass activity, the kinetic current was used due to mass-transport correction for thin-film RDEs:<sup>4</sup>

$$I_{\text{k}} (\text{A}) = \frac{I_{\text{lim}} (\text{A}) \times I (\text{A})}{I_{\text{lim}} - I}$$

where  $I_k$  is the kinetic current.  $I_{lim}$  is the measured limiting current which is the current at 0.4  $V_{RHE}$  in our research.  $I$  is the current at the specified potential. 0.9  $V_{RHE}$  is used in the usual case. The mass activity was calculated by the following equation:<sup>5</sup>

$$\text{Mass activity (A mg}_{Pt}^{-1}) = \frac{I_k (A)}{L_{Pt} (mg_{Pt} cm^{-2}) A_g (cm^2)}$$

However, mass activity determined by the equation above is not suitable to analyze the activity under a wide range of potential as in Fig. 3b. Therefore, mass activity in Fig. 3b was calculated by the following equation:

$$\text{Mass activity (A mg}_{Pt}^{-1}) = \frac{\text{Current density (mA cm}^{-2})}{L_{Pt} (mg_{Pt} cm^{-2})} \quad 3$$

$$\text{Mass activity (A mg}_{Pt}^{-1}) = \frac{I_k (A)}{L_{Pt} (mg_{Pt} cm^{-2}) A_g (cm^2)} \quad 10$$

### Calculation of charge transfer number (n)

The electrons transferred number in the ORR can be measured by well-known Koutecky-Levich (K-L) equation:

$$\frac{1}{J} = \frac{1}{J_L} + \frac{1}{J_K} = \frac{1}{B\omega^{1/2}} + \frac{1}{J_K}$$

$$B = 0.62nFC_0(D_0)^{2/3}\nu^{1/6}$$

in which  $J$  stands for the measured current density,  $J_L$  and  $J_K$  denote the diffusion-limiting current density and the kinetic-limiting current density, respectively.<sup>6</sup>  $B$  represents the slope of the K-L plots and “ $\omega$ ” is the RDE rotation rate, which is equal to  $2\pi N$  ( $N$ : linear rotation speed). ‘ $n$ ’ is the number of electrons involved in ORR, ‘ $F$ ’ is the Faraday constant ( $96,485 \text{ C mol}^{-1}$ ), ‘ $C_0$ ’ is the bulk concentration of  $O_2$  ( $1.2 \times 10^{-3} \text{ mol L}^{-1}$ ), ‘ $D_0$ ’ is the diffusion coefficient of  $O_2$  ( $1.9 \times 10^{-5} \text{ cm}^2 \text{ s}^{-1}$ ) in 0.1 M KOH electrolyte, and  $\nu$  is the kinematic viscosity of the electrolyte ( $0.1 \text{ m}^2 \text{ s}^{-1}$ ) in 0.1 M KOH electrolyte.

### Calculation of electrochemical double layer capacitance

Electrochemical double-layer capacitance ( $C_{dl}$ ) was estimated by measuring CV scans in  $N_2$ -saturated 0.1 M KOH solution at the potential range where only non-Faradaic current generates (i.e., 0.2 – 0.3  $V_{RHE}$ ). CV scans were conducted at scan rates 20, 40, 60, and 80  $\text{mV s}^{-1}$  over the voltage range. The difference in current density between the anodic and cathodic sweeps ( $J_{anodic} - J_{cathodic}$ ) at the mid potential of 0.15  $V_{RHE}$  was plotted as a function of the scan rate in which the slope corresponds to twice the  $C_{dl}$  of the catalyst.<sup>7</sup>

### Preparation of the MEAs and single-cell tests

The MEAs for AEMFC was prepared by a catalyst-coated membrane (CCM) method. Prior to catalyst layer coating process, the QPC-TMA<sup>8</sup> membranes (50  $\mu\text{m}$ ) were converted into hydroxide forms by immersing them in a 1.0 M KOH aqueous solution for 2 h, followed by rinsing with deionized water. Commercial 60 wt.% PtRu/C (Alfa Aesar) and the prepared 0.7 wt.% catalyst powder were used as anode and cathode catalyst, respectively. Catalyst slurries were prepared by mixing the catalysts with a QPC-TMA ionomer (5 wt.% ionomer in n-propanol aqueous solution, the ionomer to support weight ratio were 0.5 for anode, and 0.4 for cathode, respectively) in an aqueous solution of isopropyl alcohol. To obtain homogeneous dispersion, each catalyst slurry was ultrasonicated for more than 30 min. The prepared slurries were directly sprayed onto the membranes to fabricate catalyst layers. The catalytic material loading was  $0.4 \text{ mg}_{PtRu} \text{ cm}^{-2}$  for anode, and  $0.01 \text{ mg}_{Pt} \text{ cm}^{-2}$  for cathode, respectively. The active area of the MEAs were  $5 \text{ cm}^2$ . Prior to the single-cell application, the CCM was immersed in a 1.0 M KOH aqueous solution for 1 h to convert the QPC-TMA ionomer into a hydroxide form and rinsing with deionized water. Afterward, the CCM was sandwiched between two gas

diffusion layers with microporous layer (JNT-30-A6H, JNTG Co.) without a hot-pressing process. For benchmarking, the MEAs with commercial 20 wt.% Pt/C (Alfa Aesar) was also prepared by using the same fabrication process (Table S5 and S6). To evaluate the AEMFC performance of the prepared MEAs, each MEA was inserted between two graphite plates with a one-channel serpentine-type flow field (2.2 cm x 2.3 cm). Single cell was assembled by applying torque (8.5 N m) to each screw of the end plates and connected to a fuel cell test station (CNL Energy). To evaluate the AEMFC performance of the MEAs, humidified hydrogen and oxygen were fed to the anode and the cathode at constant flow rates of 0.8 and 1.1 L min<sup>-1</sup>, respectively. The temperature of the single cell was fixed at 60 °C, and the dew points of the hydrogen and oxygen gases were maintained at 56 and 58 °C, respectively. The AEMFC performance was evaluated under the above condition until the stabilized cell voltage was achieved at the corresponding discharge current.

### Computational methods

All density functional theory (DFT) calculations were carried out using the Vienna ab initio package (VASP) with the projector augmented wave method (PAW) to describe interaction between valence and core electrons.<sup>9-11</sup> The general gradient approximation (GGA) with the Perdew, Burke and Ernzerhof (PBE) was employed for the plane-basis wave expansion.<sup>12</sup> The Brillouin zone was sampled by a Gamma-centered k-points grids of 2 × 2 × 1 for optimization of cell parameters and kinetic energy cut-off of 400 eV was used.<sup>13</sup> The energy convergence criteria in the self-consistent field were set to 10<sup>-6</sup> eV. All geometry structures

were fully relaxed until Hellman-Feynman forces achieved a range of 0.15 eV Å<sup>-1</sup>. The supercell dimensions for Pt NPs slab, consisting of 64 atoms, are 1.25 × 1.25 × 27.25 Å, and to avoid the interactions between the adjacent periodic supercells, the vacuum layers were placed along the c axis enough. The charged Pt (111) slab was optimized by adding excess electrons to the neutral Pt (111) slab, in which the number of electrons derived from the calculated density of states (DOS) of the neutral Pt (111) slab (Fig. S27). By considering the previous literature,<sup>14</sup> we calculated the number of excess electrons on the Pt (111) from the difference between work function values of Pt metal and the negatively charged our Pt NPs, which was set to be around 1.0 eV in the present work (Fig. S26). In a simple manner, the number of excess electrons were extracted by the integral of the green area in the density of state, which gives 0.27e<sup>-</sup> per one Pt atom at the surface.

Oxygen reduction reaction via the four electrons pathway on Pt NPs under alkaline condition (pH = 13) undergoes as follows,

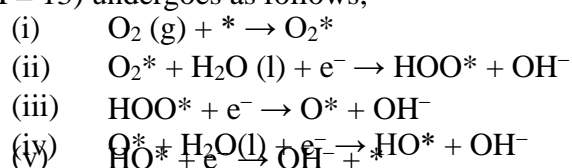

The Gibbs free energies of adsorbates ( $\Delta GG$ ) were obtained using the following equation,

$$\Delta GG = \Delta EE_{\text{adsorbate}} + \Delta EE_{\text{vacuum}} - T\Delta SS + \Delta GG_{\text{UU}} + \Delta GG_{\text{pppp}}$$

where  $\Delta EE_{\text{adsorbate}}$ ,  $\Delta EE_{\text{vacuum}}$ , T and  $\Delta SS$  represent the adsorption energy derived from DFT calculations, difference in zero-point energies, the temperature at 300 K, and the changes of entropies, respectively.  $\Delta GG_{\text{UU}}$  is  $-neU$ , where n, e and U are the number of transferred

electrons, the transferred charge and U is the applied voltage.  $\Delta GG_{\text{pppp}}$  is relative to  $-k_B T \ln(10) \times \text{pppp}$ , where  $k_B$  is the Boltzmann constant. Noted that for  $\Delta GG$  calculations of four electrons pathway in ORR, the final reaction step was set as zero.

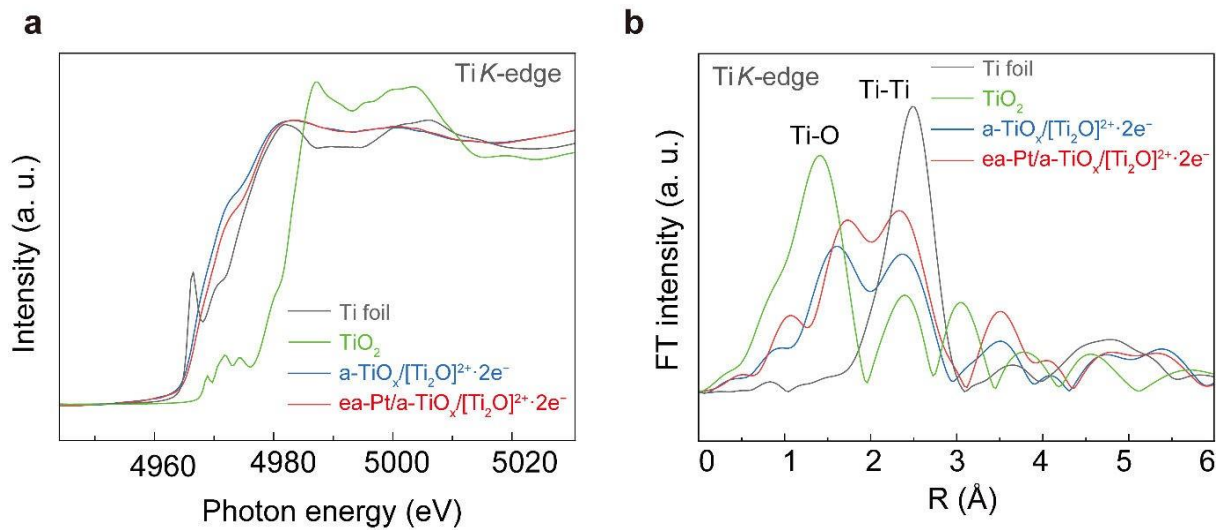

**Fig. S1** Comparison between different Ti at the Ti *K*-edge spectra. (a) X-ray absorption near-edge spectroscopy (XANES) and (b) extended X-ray absorption fine structure (EXAFS) of a-TiO<sub>x</sub>/[Ti<sub>2</sub>O]<sup>2+</sup>·2e<sup>-</sup> and ea-Pt/a-TiO<sub>x</sub>/[Ti<sub>2</sub>O]<sup>2+</sup>·2e<sup>-</sup> at Ti *K*-edge.

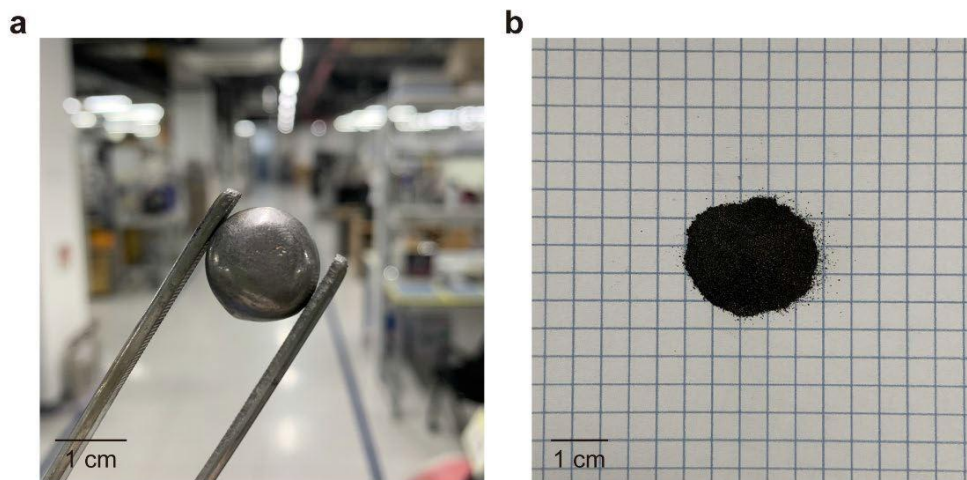

**Fig. S2** Air-stable  $[\text{Ti}_2\text{O}]^{2+}\cdot 2\text{e}^-$  electride. (a) Air-exposed  $[\text{Ti}_2\text{O}]^{2+}\cdot 2\text{e}^-$  bulk. (b) Pulverized powders of  $[\text{Ti}_2\text{O}]^{2+}\cdot 2\text{e}^-$  in air.



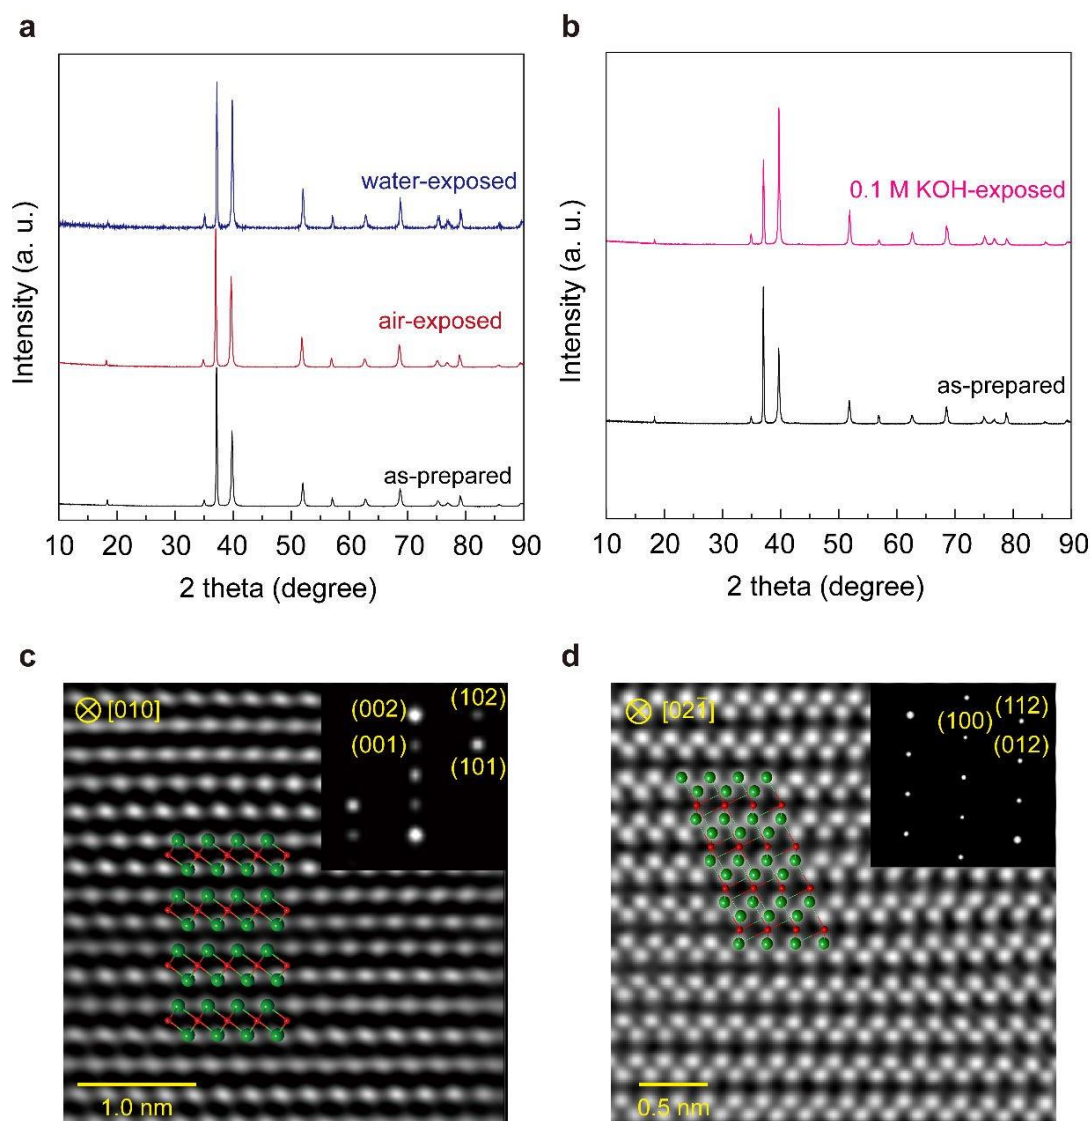

**Fig. S3** Chemical stability and atomic structure of  $[\text{Ti}_2\text{O}]^{2+}\cdot 2\text{e}^-$  electride. (a) Powder XRD patterns of as-prepared (black), air-exposed (red), and water-exposed (blue)  $[\text{Ti}_2\text{O}]^{2+}\cdot 2\text{e}^-$ . (b) Powder XRD patterns of as-prepared (black) and 1.0 M KOH-exposed (pink)  $[\text{Ti}_2\text{O}]^{2+}\cdot 2\text{e}^-$ . (c), (d) Atomic-scale high-angle annular dark-field STEM. The corresponding crystal structures are superimposed on the observed images.

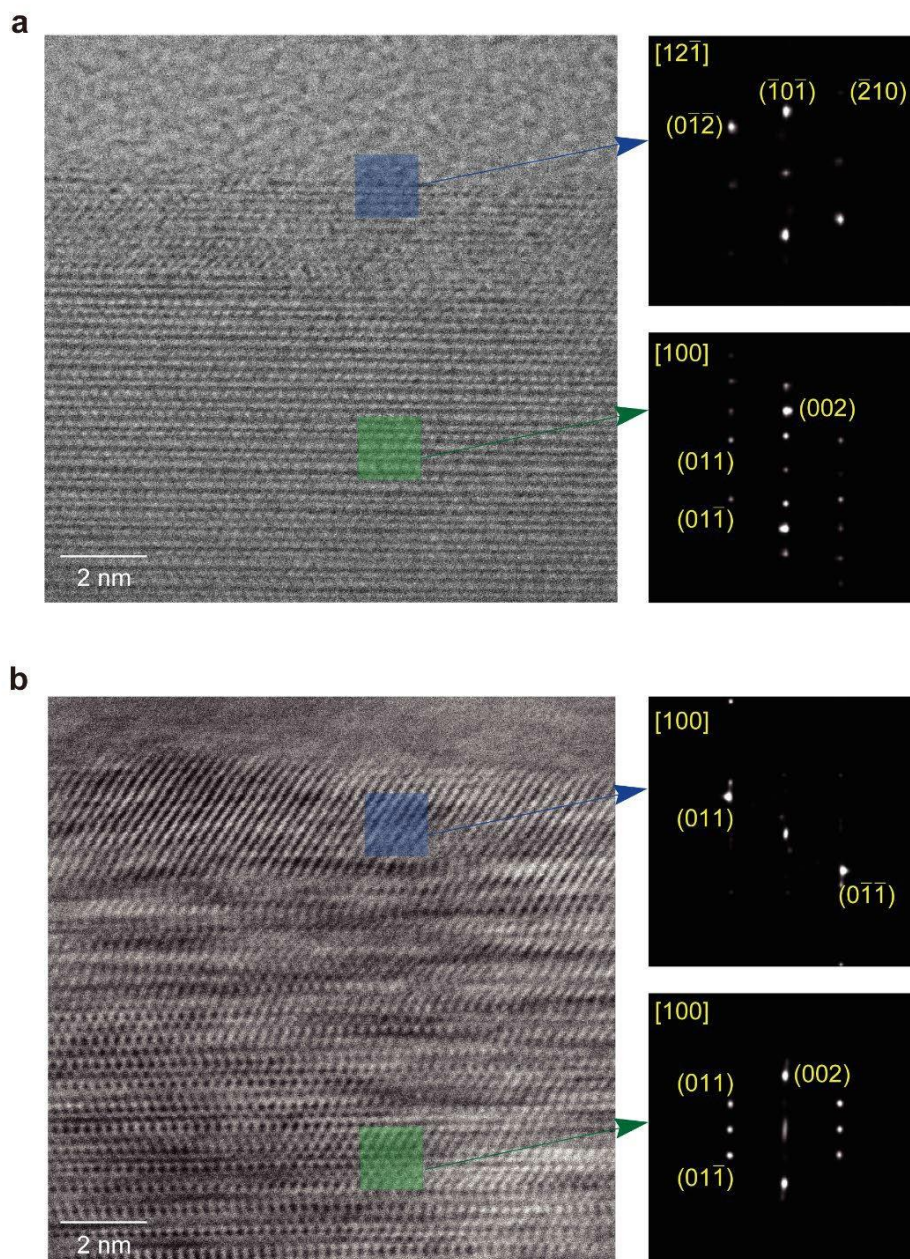

**Fig. S4** Surface structure of as-cleaved  $[\text{Ti}_2\text{O}]^{2+}\cdot 2\text{e}^-$  electride. (a), (b) HR-STEM image of as-cleaved  $[\text{Ti}_2\text{O}]^{2+}\cdot 2\text{e}^-$  (left) and corresponding diffraction patterns of surface (right top, blue box) and bulk crystal (right bottom, green box) regions. Two different regions in the identical sample were analyzed and presented as (a) and (b).

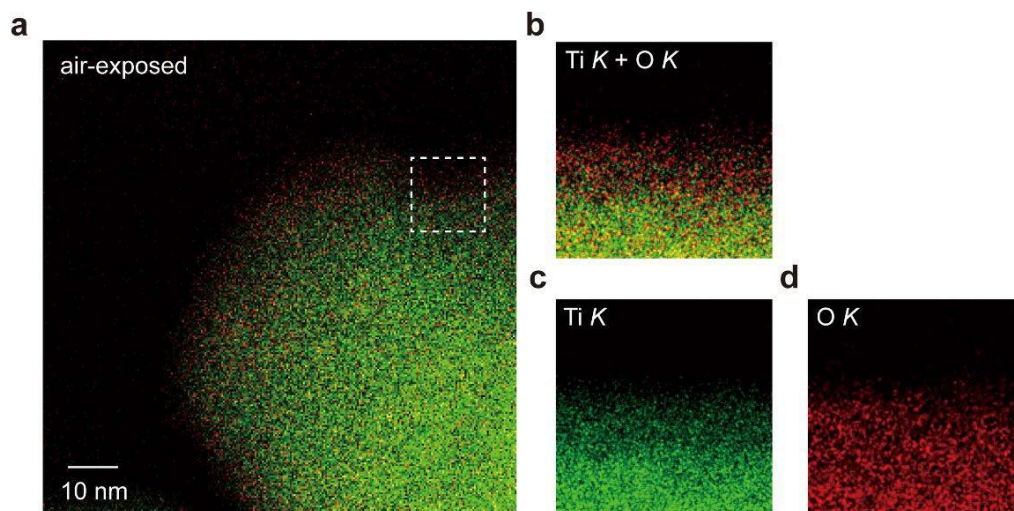

**Fig. S5** Surface structure of air-exposed  $[\text{Ti}_2\text{O}]^{2+}\cdot 2\text{e}^-$  electride. (a) STEM-EDX elemental mapping image of air-exposed  $[\text{Ti}_2\text{O}]^{2+}\cdot 2\text{e}^-$ , which is composed of Ti *K* (green) and O *K* (red) signals. (b) Combined image of Ti *K* and O *K* signals of the white dashed region in (a). (c), (d) Separated images of (c) Ti *K* and (d) O *K* signals from (b).

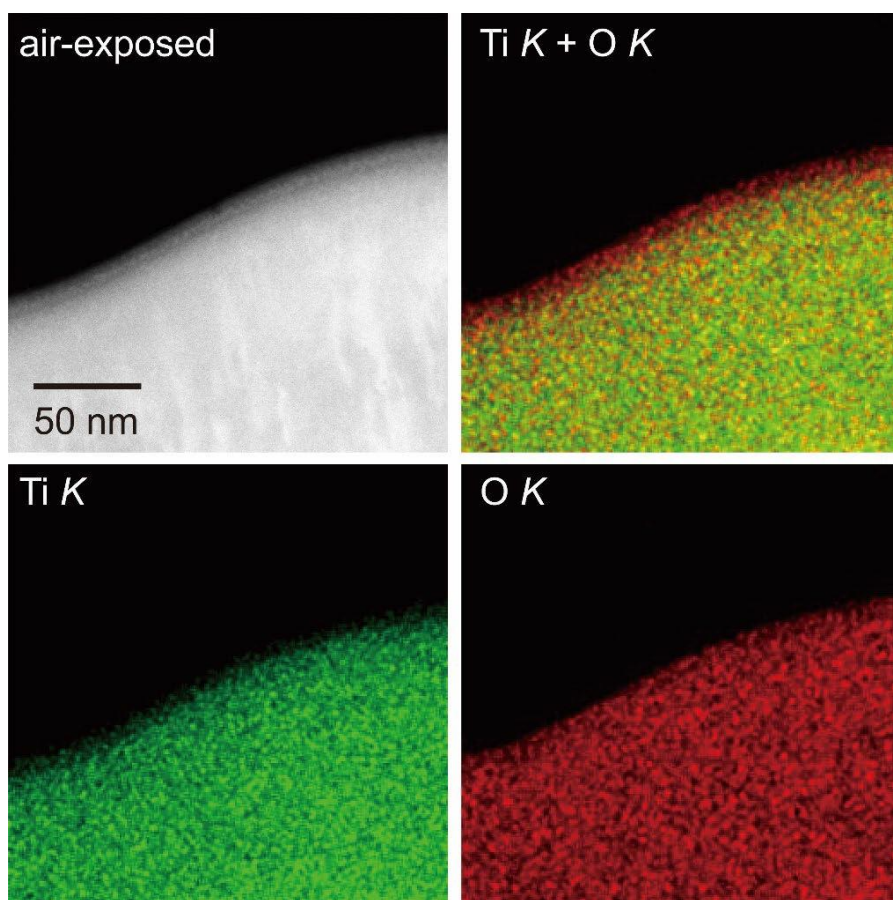

**Fig. S6** HR-TEM image and STEM-EDX elemental mapping of air-exposed  $[\text{Ti}_2\text{O}]^{2+} \cdot 2\text{e}^-$ , which is composed of Ti K (green) and O K (red) signals.

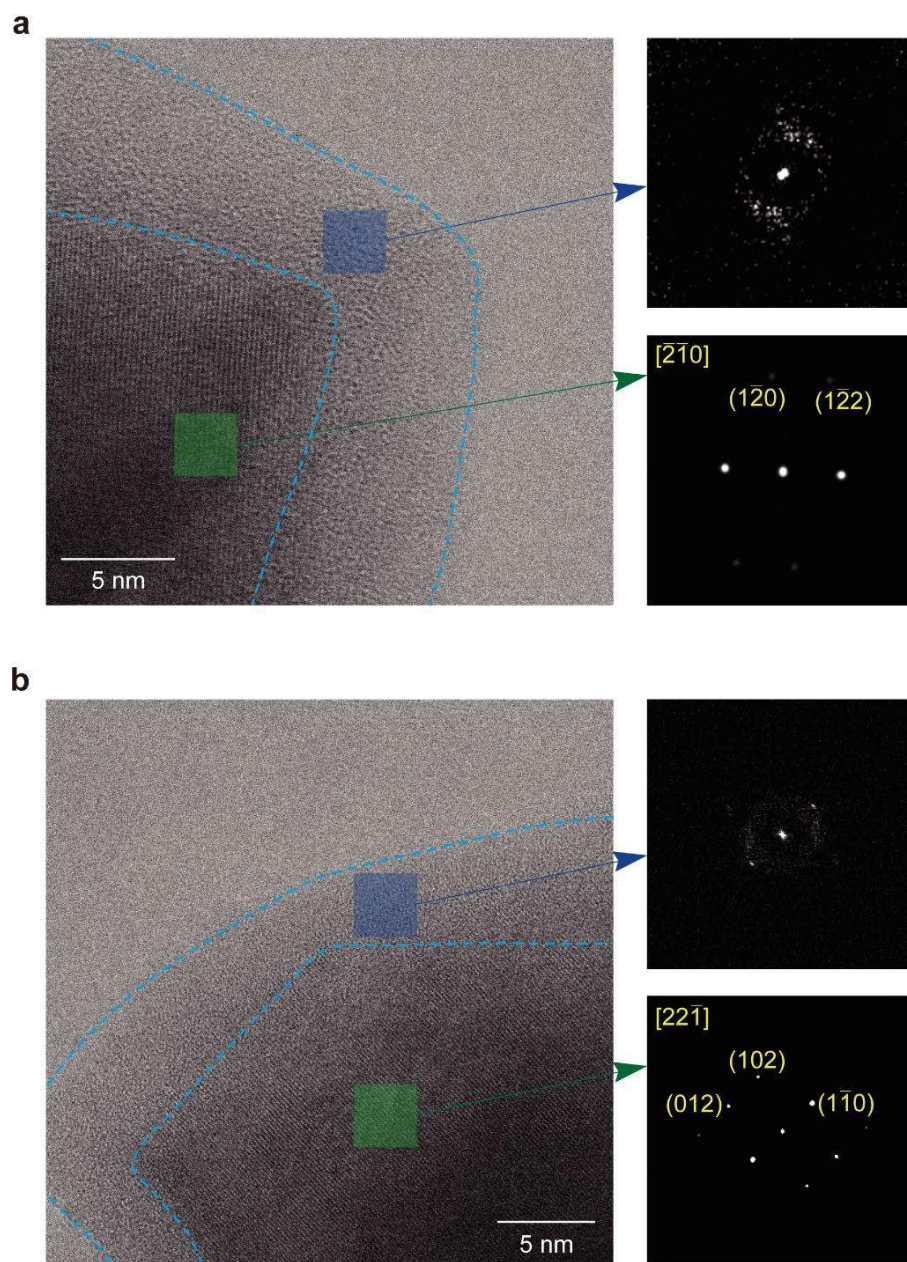

**Fig. S7** Surface structure of water-exposed  $[\text{Ti}_2\text{O}]^{2+}\cdot 2\text{e}^-$  electride. (a), (b) HR-STEM image of water-exposed  $[\text{Ti}_2\text{O}]^{2+}\cdot 2\text{e}^-$  (left) and corresponding diffraction patterns of surface amorphous (right top, blue box) and bulk crystal (right bottom, green box) regions. Two different regions in the identical sample were analyzed and presented as (a) and (b).

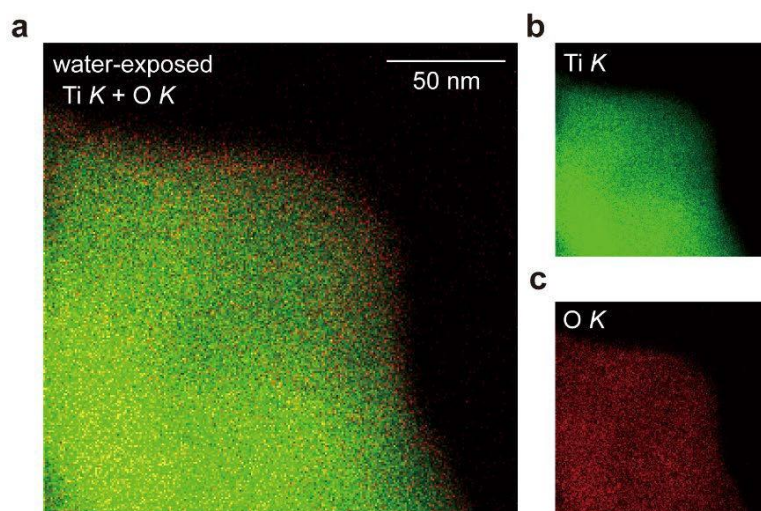

**Fig. S8** Surface structure of water-exposed  $[\text{Ti}_2\text{O}]^{2+}\cdot 2\text{e}^-$  electride. (a), (b), (c) STEM-EDX elemental mapping of water-exposed  $[\text{Ti}_2\text{O}]^{2+}\cdot 2\text{e}^-$  (a), which is composed of (b) Ti K (green) and (c) O K (red) signals.

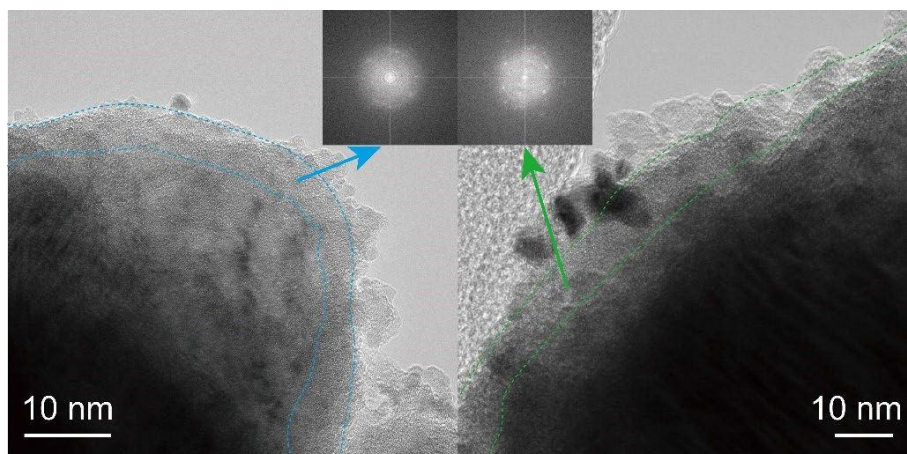

**Fig. S9** HRTEM image of ea-Pt/a-TiO<sub>x</sub>/[Ti<sub>2</sub>O]<sup>2+</sup>·2e<sup>-</sup> and corresponding diffraction patterns of surface amorphous regions.

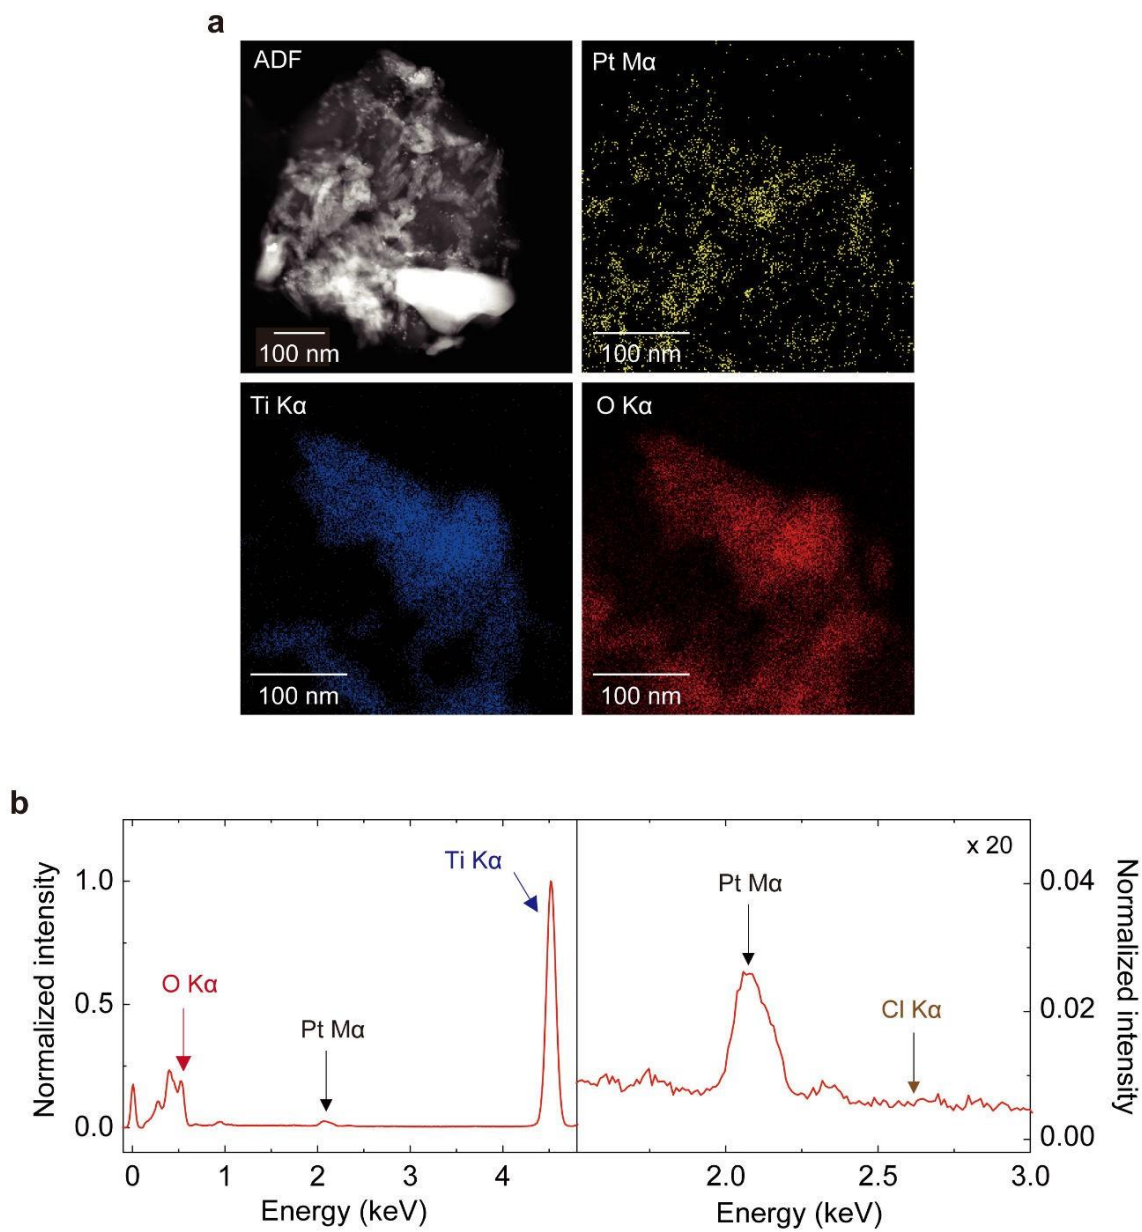

**Fig. S10** EDX mapping of ea-Pt/a-TiO<sub>x</sub>/[Ti<sub>2</sub>O]<sup>2+</sup>·2e<sup>-</sup>. (a) STEM-EDX elemental mapping images of ea-Pt/a-TiO<sub>x</sub>/[Ti<sub>2</sub>O]<sup>2+</sup>·2e<sup>-</sup>. (b) Corresponding EDX spectra.



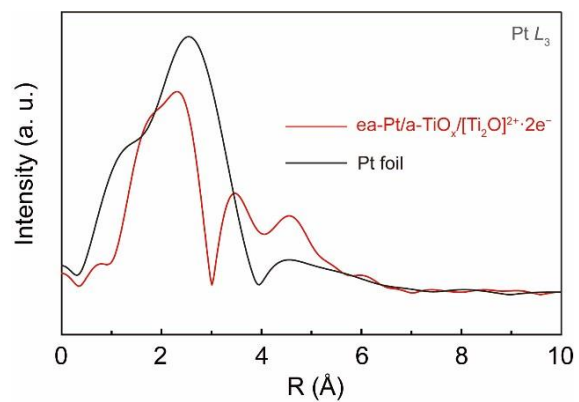

**Fig. S11** Extended X-ray absorption fine structure (EXAFS) of ea-Pt/a-TiO<sub>x</sub>/[Ti<sub>2</sub>O]<sup>2+</sup>·2e<sup>-</sup> at Pt  $L_3$ -edge.

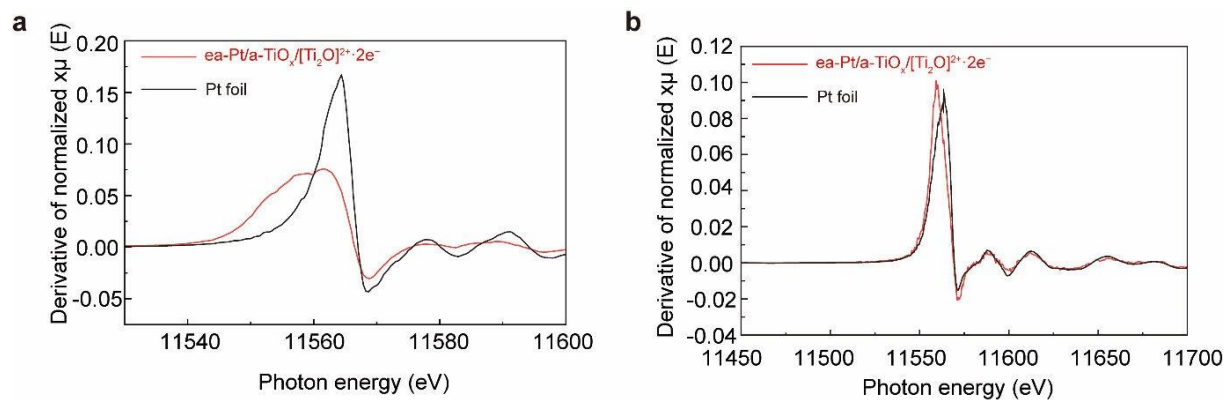

**Fig. S12** Derivatives of normalized intensity at Pt *L*-edge measured at different beam line, (a) 1D KIST-PAL and (b) 8C beamlines of the Pohang accelerator laboratory.

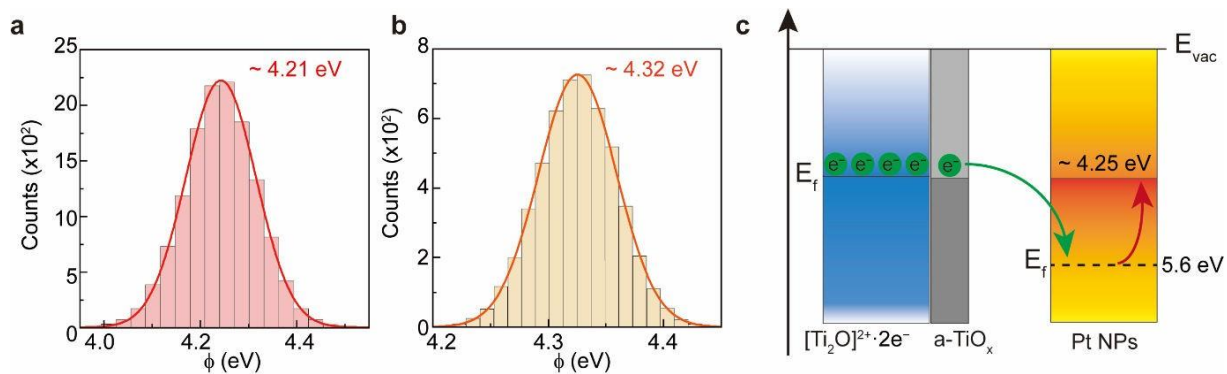

**Fig. S13** Measurement of the work function by KPFM. (a) Work function value of  $[\text{Ti}_2\text{O}]^{2+}\cdot 2\text{e}^-$  sample. (b) Work function value of  $\text{a-TiO}_x/[\text{Ti}_2\text{O}]^{2+}\cdot 2\text{e}^-$  sample. (c) Schematic illustration of band alignment due to the charge transfer for the negatively charged Pt NPs on the surface of  $\text{a-TiO}_x/[\text{Ti}_2\text{O}]^{2+}\cdot 2\text{e}^-$ .

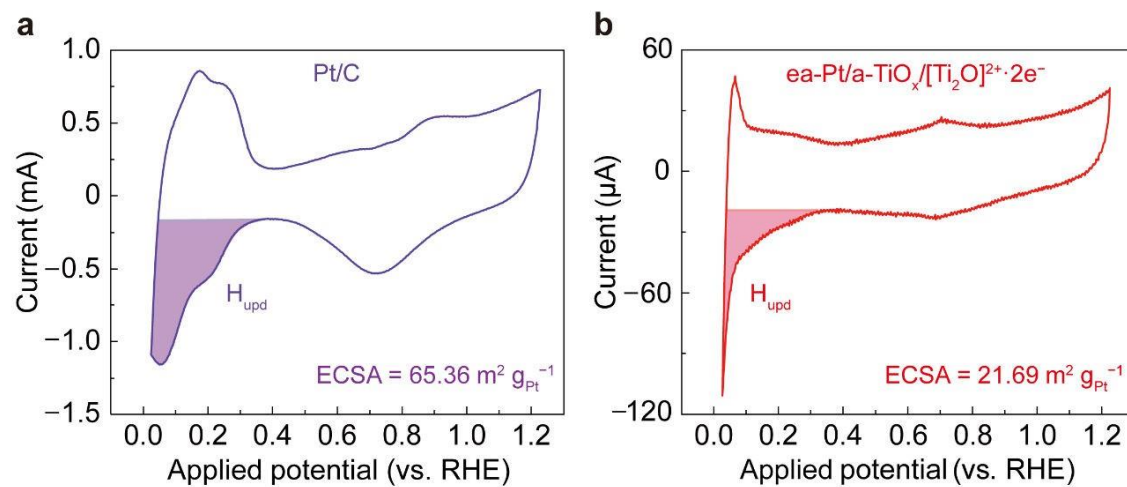

**Fig. S14** Electrochemical surface area (ECSA) determination. (a) Cyclic voltammetry (CV) curves for commercial Pt/C measured in N<sub>2</sub>-saturated 0.1 M HClO<sub>4</sub> solution using a scan rate of 5 mV s<sup>-1</sup> and the rotating speed of 1,600 rpm. (b) ea-Pt/a-TiO<sub>x</sub>/[Ti<sub>2</sub>O]<sup>2+</sup>·2e<sup>-</sup> catalysts measured under the same condition.

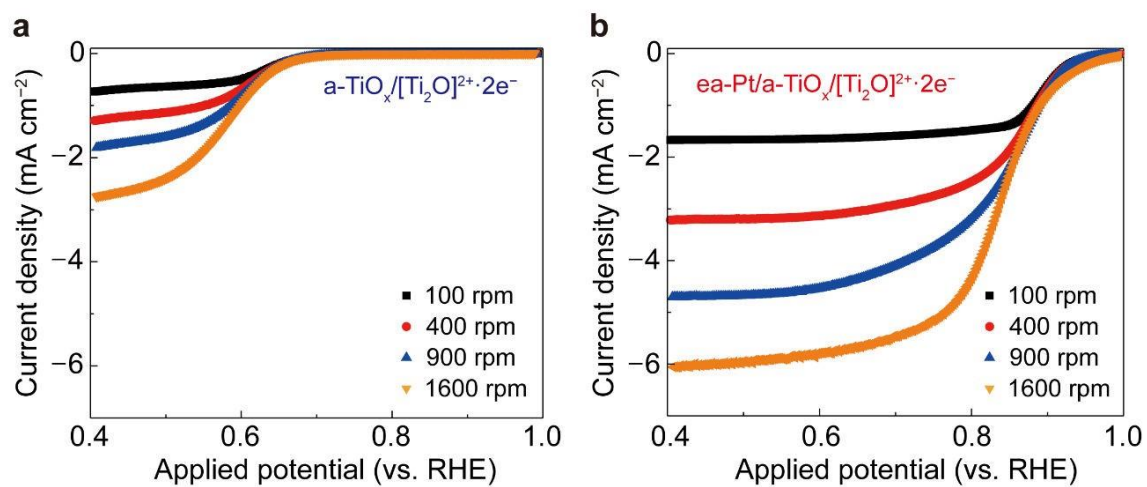

**Fig. S15** ORR LSV polarization curves. (a) ORR LSV polarization curves for a-TiO<sub>x</sub>/[Ti<sub>2</sub>O]<sup>2+</sup>·2e<sup>-</sup> catalysts measured in O<sub>2</sub>-saturated 0.1 M KOH with different rotating speeds at a scan rate of 5 mV s<sup>-1</sup>. (b) ea-Pt/a-TiO<sub>x</sub>/[Ti<sub>2</sub>O]<sup>2+</sup>·2e<sup>-</sup> catalysts measured under the same conditions.

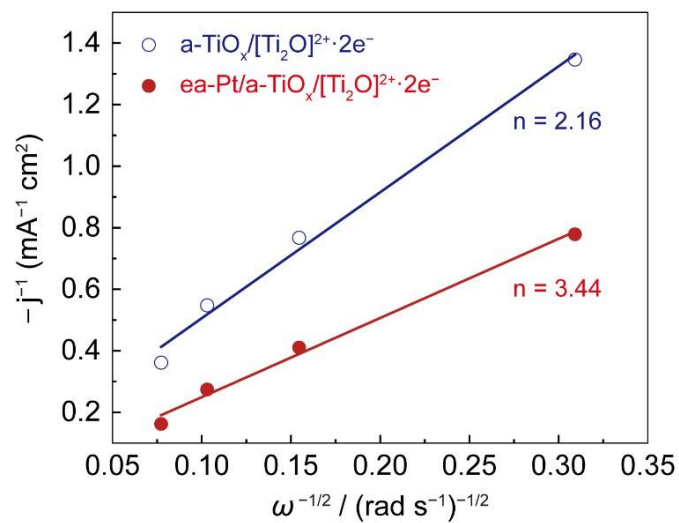

**Fig. S16** Estimation of charge transfer number for ORR. Koutecky-Levich plots of  $\text{a-TiO}_x/[\text{Ti}_2\text{O}]^{2+} \cdot 2\text{e}^-$  and  $\text{ea-Pt/a-TiO}_x/[\text{Ti}_2\text{O}]^{2+} \cdot 2\text{e}^-$  catalysts at an electrode potential of 0.4 V vs. RHE.

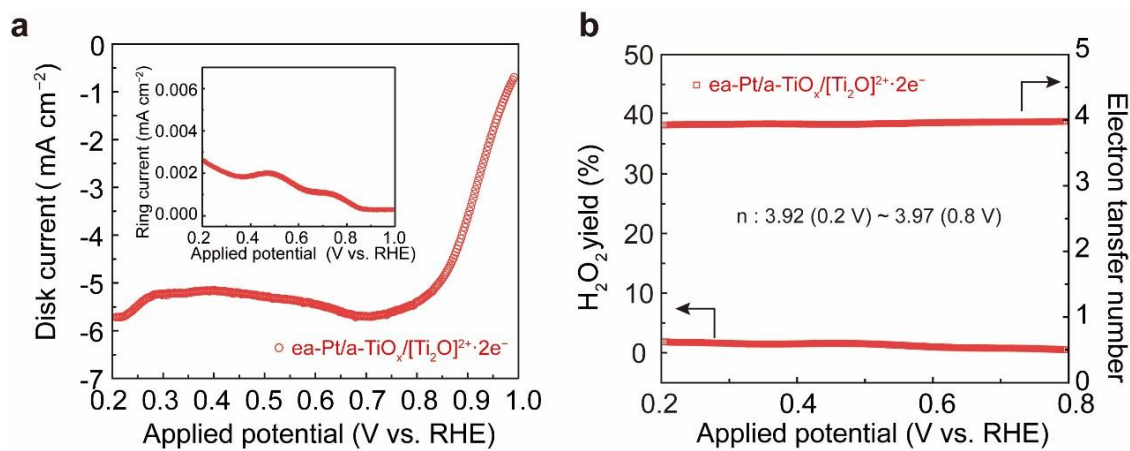

**Fig. S17** Measurement of the electron transfer number for ORR. (a) Disk and ring (inset) currents measured by using RRDE for ORR in 0.1 M KOH. (b) Calculated charge transfer number and H<sub>2</sub>O<sub>2</sub> yield for the  $\text{ea-Pt/a-TiO}_x/[\text{Ti}_2\text{O}]^{2+} \cdot 2\text{e}^-$ .

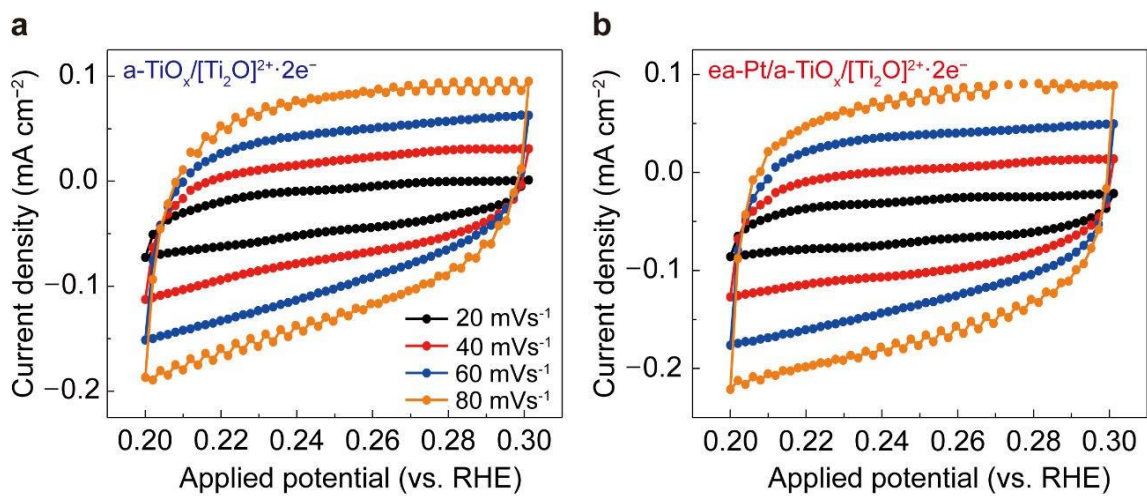

**Fig. S18** Electrical double layer capacitance measurement. (a) CV curves for  $a\text{-TiO}_x/[\text{Ti}_2\text{O}]^{2+}\cdot 2e^-$  catalysts measured in a capacitive current region ( $0.20 - 0.30 V_{\text{RHE}}$ ) at scan rates of 20, 40, 60, and 80  $\text{mV s}^{-1}$  in  $\text{N}_2$ -saturated 0.1 M KOH electrolyte. (b)  $ea\text{-Pt}/a\text{-TiO}_x/[\text{Ti}_2\text{O}]^{2+}\cdot 2e^-$  catalysts measured under the same conditions.



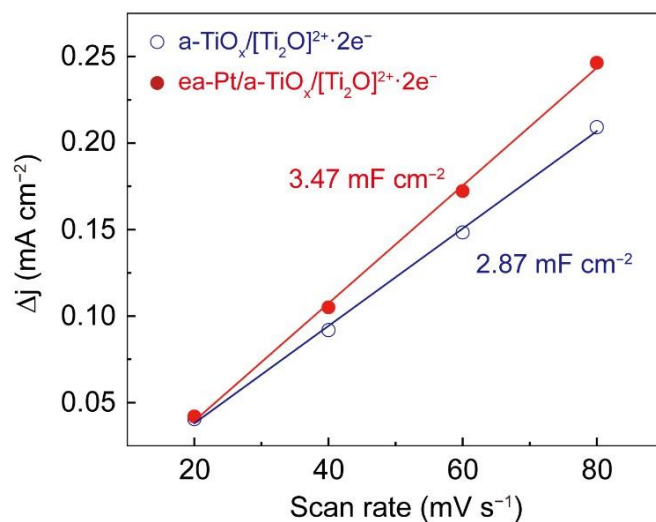

**Fig. S19** Electrical double layer capacitance measurement. Electrical double layer capacitance measurement for a-TiO<sub>x</sub>/[Ti<sub>2</sub>O]<sup>2+</sup>·2e<sup>-</sup> and ea-Pt/a-TiO<sub>x</sub>/[Ti<sub>2</sub>O]<sup>2+</sup>·2e<sup>-</sup> catalysts. Plots (solid lines) of current difference between anodic and cathodic sweep as a function of scan rate correspond to the values of C<sub>dl</sub>.

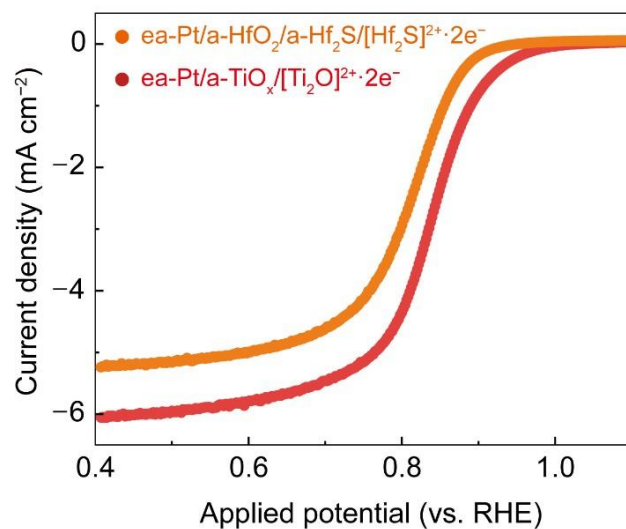

**Fig. S20** ORR polarization curves of Pt NPs supported by electrified materials. The ea-Pt/a-HfO<sub>2</sub>/a-Hf<sub>2</sub>S/[Hf<sub>2</sub>S]<sup>2+</sup>·2e<sup>-</sup> (orange) and the ea-Pt/a-TiO<sub>x</sub>/[Ti<sub>2</sub>O]<sup>2+</sup>·2e<sup>-</sup> (red) measured in 0.1 M KOH using a scan rate of 5 mV s<sup>-1</sup>.

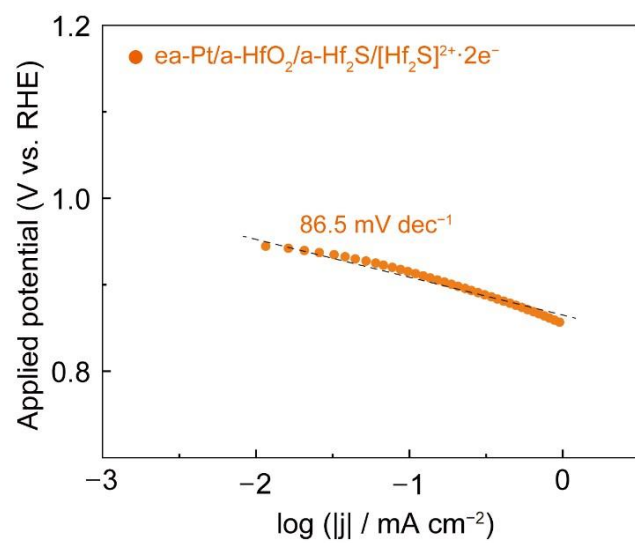

**Fig. S21** Tafel plot for the ea-Pt/a-HfO<sub>2</sub>/a-Hf<sub>2</sub>S/[Hf<sub>2</sub>S]<sup>2+</sup>·2e<sup>-</sup>. Tafel plot obtained from the ORR LSV polarization curve in Fig. S20.

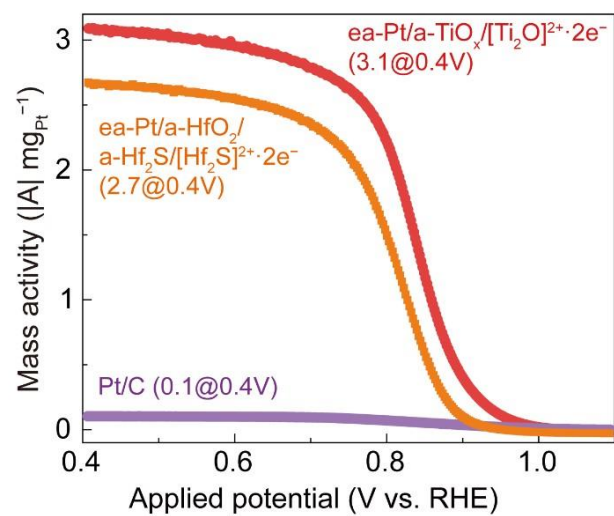

**Fig. S22** ORR mass activity. Calculated mass activity of the ea-Pt/a-HfO<sub>2</sub>/a-Hf<sub>2</sub>S/[Hf<sub>2</sub>S]<sup>2+</sup>·2e<sup>-</sup> in comparison with commercial Pt/C and ea-Pt/a-TiO<sub>x</sub>/[Ti<sub>2</sub>O]<sup>2+</sup>·2e<sup>-</sup> catalysts.

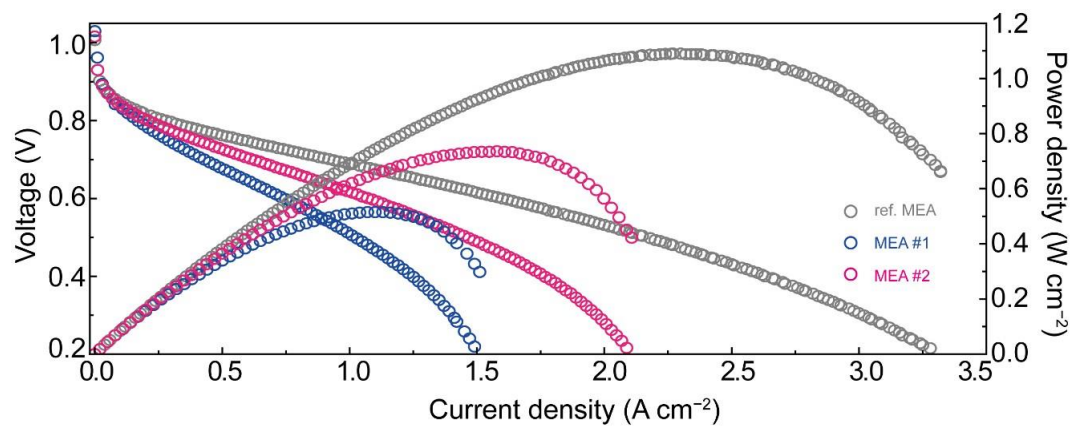

**Fig. S23** Steady-state polarization plot of AEMFC fabricated by using ea-Pt/a- $\text{TiO}_x/[\text{Ti}_2\text{O}]^{2+} \cdot 2\text{e}^-$  as the cathode electrocatalyst.

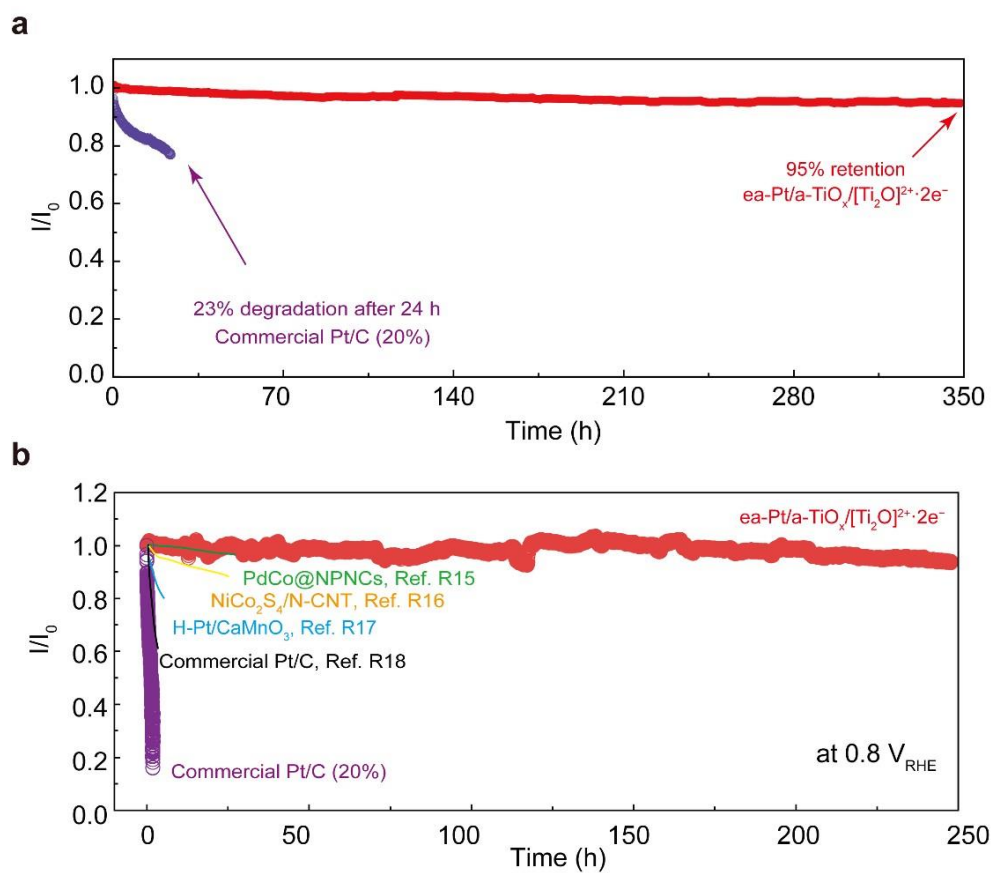

**Fig. S24** Durability test of ea-Pt/a-TiO<sub>x</sub>/[Ti<sub>2</sub>O]<sup>2+</sup>·2e<sup>-</sup> and the commercial Pt/C. (a) Durability test of ea-Pt/a-TiO<sub>x</sub>/[Ti<sub>2</sub>O]<sup>2+</sup>·2e<sup>-</sup> at a constant applied potential of 0.4 V<sub>RHE</sub>, which outperforms the durability of the commercial Pt/C. (b) Durability test of ea-Pt/a-TiO<sub>x</sub>/[Ti<sub>2</sub>O]<sup>2+</sup>·2e<sup>-</sup> and the commercial Pt/C at a constant applied potential of 0.8 V<sub>RHE</sub>, which outperforms the durability of the other catalysts that were evaluated in 0.1 M KOH solution at room temperature.

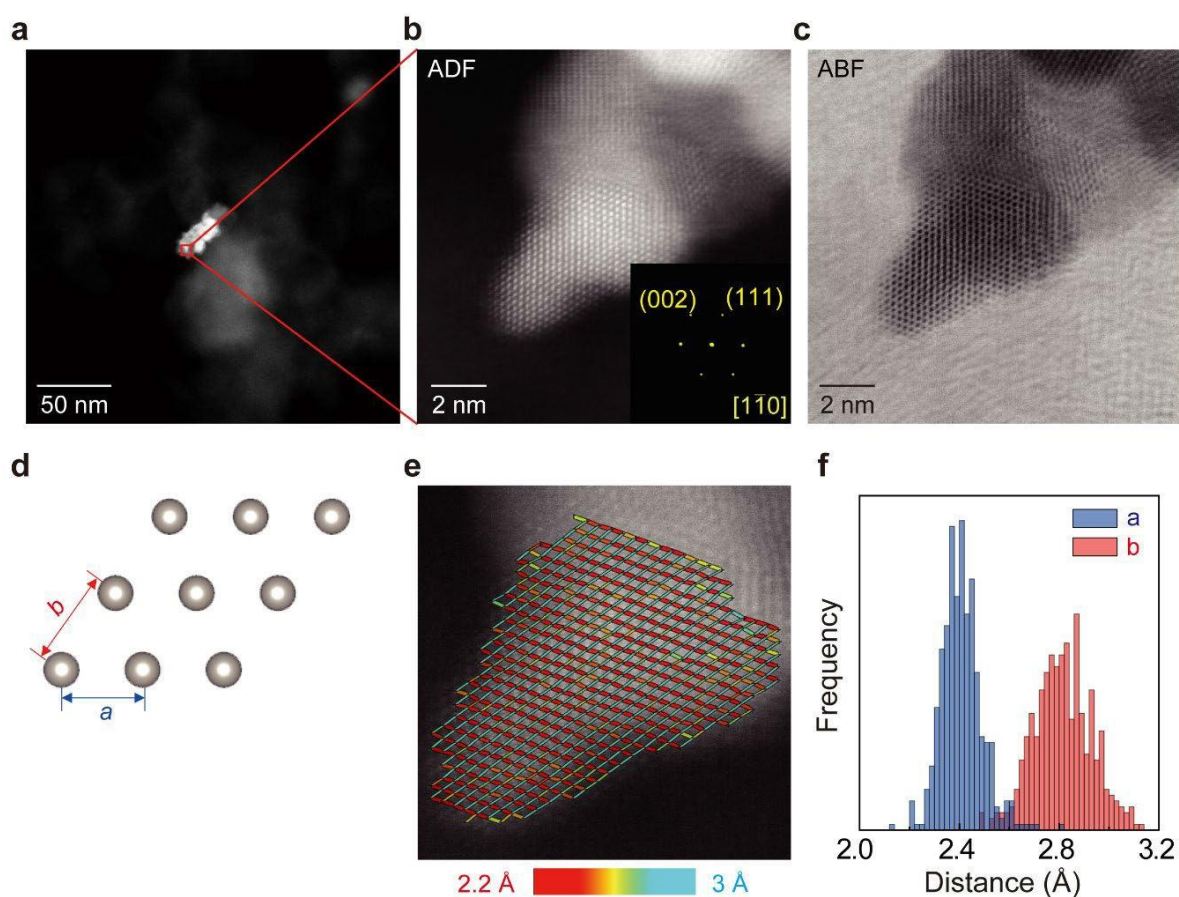

**Fig. S25** Intact surface structure of Pt NP anchored on the  $a\text{-TiO}_x/[\text{Ti}_2\text{O}]^{2+}\cdot 2e^-$  support after the ORR. (a), (b), (c) Low resolution STEM (a), annular dark-field STEM (b), and annular bright-field STEM (c) images of a Pt NP anchored on the  $a\text{-TiO}_x/[\text{Ti}_2\text{O}]^{2+}\cdot 2e^-$  support after the ORR. (d) Atomic structure on (110) plane of metal Pt. (e) Projected atomic grids for the Pt NP anchored on the  $a\text{-TiO}_x/[\text{Ti}_2\text{O}]^{2+}\cdot 2e^-$  support. (f) Distributions of atomic distance obtained by the projected atomic distance analysis for the grid region.

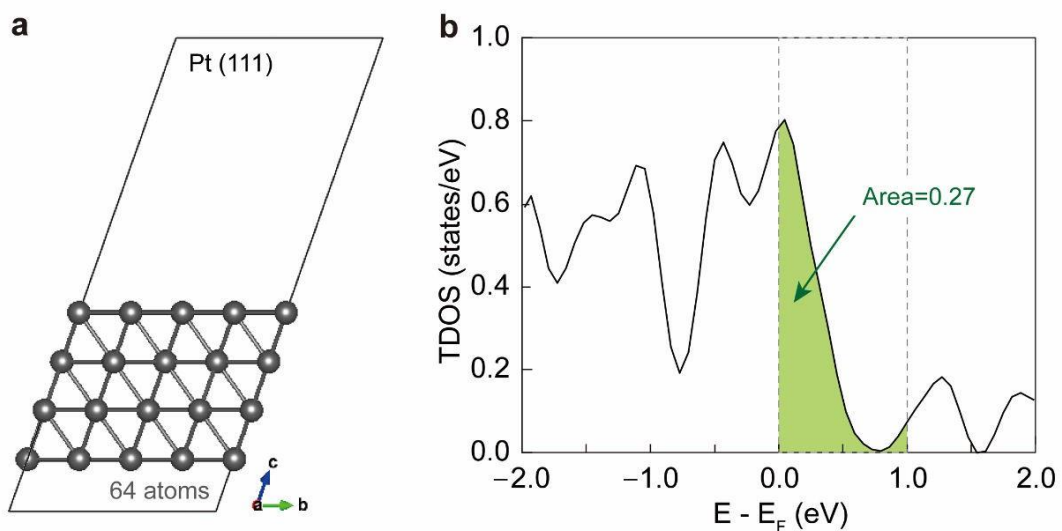

**Fig. S26** Theoretical modeling of negatively charged Pt NPs. (a) Slab model of Pt (111). (b) Corresponding total density of state (TDOS) for the neutral Pt (111), which was represented by black line. From the difference between  $\phi$  values of Pt metal and the negatively charged Pt NPs, which was set to be 1.0 eV, the number of excess electrons was extracted by the integral of the green area, which gives  $0.27e^-$  per one Pt atom.



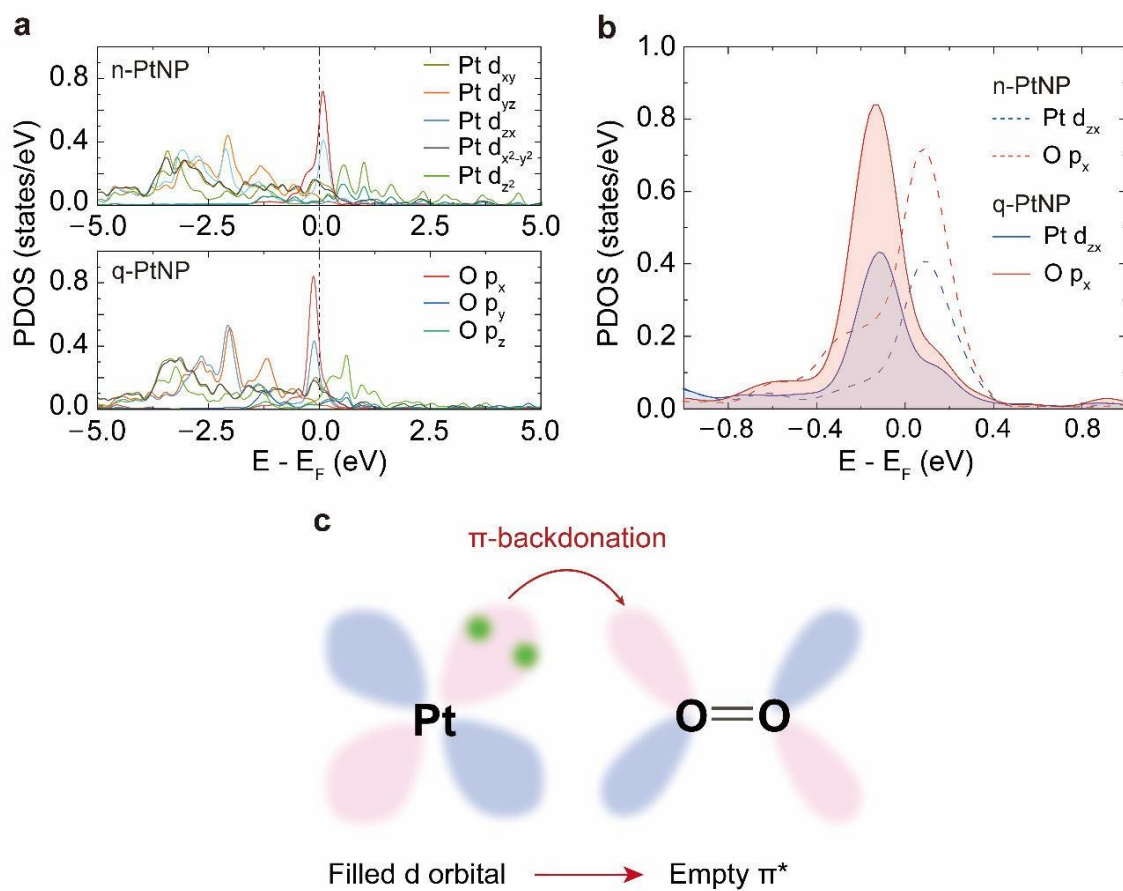

**Fig. S27** Charge transfer of surface-accumulated excess electrons to adsorbed O atoms. (a) Partial density of state (PDOS) for the modelled neutral (n-PtNP) and negatively charged Pt (111) (q-PtNP). (b) Enlarged PDOS of Pt  $d_{zx}$  and O  $p_x$  orbitals near Fermi level. (c) Schematic illustration of the  $\pi$ -backdonation from Pt  $d_{zx}$  to O  $p_x$  orbitals.

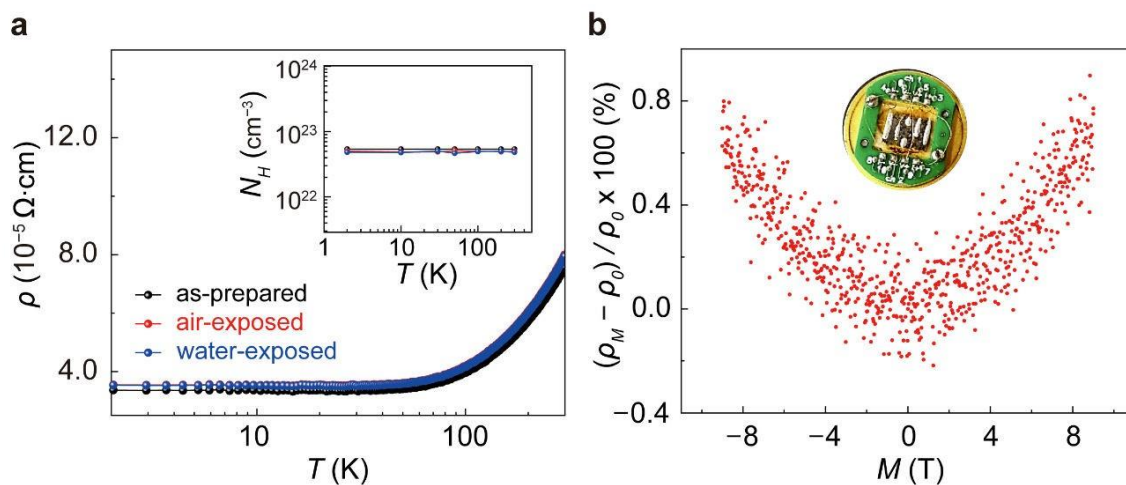

**Fig. S28** Electrical transport properties of  $[\text{Ti}_2\text{O}]^{2+} \cdot 2\text{e}^-$  electride. (a) Temperature dependence ( $T$ ) of electrical resistivity ( $\rho$ ) for the  $[\text{Ti}_2\text{O}]^{2+} \cdot 2\text{e}^-$  electrides that were exposed to different atmospheres. (b) Magnetic field ( $M$ ) dependence of magnetoresistance for the air-exposed  $[\text{Ti}_2\text{O}]^{2+} \cdot 2\text{e}^-$  electride, showing the characteristics of metallic conduction. The inset of (a) showed the temperature dependent carrier concentration ( $N_H$ ) with a negligible change.

**Table S1** Structural parameters of Ti<sub>2</sub>O crystal obtained by Rietveld refinement.

|                     |                      |
|---------------------|----------------------|
| Crystal system      | Hexagonal            |
| Space group         | $PP\bar{3}mm1$       |
| Z                   | 1                    |
| $a$ (Å)             | 2.963043(43)         |
| $b$ (Å)             | 2.963043(43)         |
| $c$ (Å)             | 4.846344(51)         |
| $\alpha$ (°)        | 90                   |
| $\beta$ (°)         | 90                   |
| $\gamma$ (°)        | 120                  |
| V (Å <sup>3</sup> ) | 36.849               |
| Ti position         | (1/3, 2/3, 0.267815) |
| O position          | (0, 0, 0)            |
| $R_{wp}$ (%)        | 7.07                 |
| $R_p$ (%)           | 5.26                 |

**Table S2** XPS results of the a-TiO<sub>x</sub>/[Ti<sub>2</sub>O]<sup>2+</sup>·2e<sup>-</sup> samples. Peaks are calibrated with reference Au 4f.

| Samples                            |                  | Position (eV) | Area (a.u.) | Atomic percentage (%) |
|------------------------------------|------------------|---------------|-------------|-----------------------|
| Ti <sup>4+</sup> 2p<br>(eV)/(at.%) | 12h-Ar-sputtered | N.A.          | N.A.        | N.A.                  |
|                                    | 8h-Ar-sputtered  | 459.08        | 199.66      | 38.66                 |
|                                    | Air-exposed      | 459.04        | 1048.61     | 76.78                 |
| Ti <sup>3+</sup> 2p<br>(eV)/(at.%) | 12h-Ar-sputtered | 457.35        | 30.74       | 1.79                  |
|                                    | 8h-Ar-sputtered  | 457.34        | 166.48      | 37.38                 |
|                                    | Air-exposed      | 457.28        | 137.37      | 12.22                 |
| Ti <sup>2+</sup> 2p<br>(eV)/(at.%) | 12h-Ar-sputtered | 454.41        | 684.12      | 98.21                 |
|                                    | 8h-Ar-sputtered  | 454.63        | 109.22      | 23.96                 |
|                                    | Air-exposed      | 454.59        | 103.75      | 11.00                 |
| O <sup>2-</sup> 1s<br>(eV)/(at.%)  | 12h-Ar-sputtered | 530.78        | 143.00      | 43.23                 |
|                                    |                  | 531.76        | 196.06      | 57.78                 |
|                                    | 8h-Ar-sputtered  | 530.85        | 256.36      | 42.15                 |
|                                    |                  | 531.50        | 351.80      | 57.85                 |
|                                    | Air-exposed      | 530.92        | 706.03      | 51.50                 |
|                                    |                  | 531.55        | 665.02      | 48.50                 |

**Table S3** XPS results of the Pt/a-TiO<sub>x</sub>/[Ti<sub>2</sub>O]<sup>2+</sup>·2e<sup>-</sup> and ea-Pt/a-TiO<sub>x</sub>/[Ti<sub>2</sub>O]<sup>2+</sup>·2e<sup>-</sup>. Peak positions of Pt 4f are calibrated with reference Au 4f.

| Samples                            |                                                                                  | Position (eV) | Area (a.u.) | Atomic percentage (%) |
|------------------------------------|----------------------------------------------------------------------------------|---------------|-------------|-----------------------|
| Pt <sup>4+</sup> 4f<br>(eV)/(at.%) | Pt/a-TiO <sub>x</sub> /<br>[Ti <sub>2</sub> O] <sup>2+</sup> ·2e <sup>-</sup>    | 74.91         | 12307.04    | 33.75                 |
|                                    | ea-Pt/a-TiO <sub>x</sub> /<br>[Ti <sub>2</sub> O] <sup>2+</sup> ·2e <sup>-</sup> | N.A.          | N.A.        | N.A.                  |
| Pt <sup>2+</sup> 4f<br>(eV)/(at.%) | Pt/a-TiO <sub>x</sub> /<br>[Ti <sub>2</sub> O] <sup>2+</sup> ·2e <sup>-</sup>    | 72.41         | 10291.60    | 28.22                 |
|                                    | ea-Pt/a-TiO <sub>x</sub> /<br>[Ti <sub>2</sub> O] <sup>2+</sup> ·2e <sup>-</sup> | 72.13         | 1610.16     | 25.56                 |
| Pt <sup>0</sup> 4f<br>(eV)/(at.%)  | Pt/a-TiO <sub>x</sub> /<br>[Ti <sub>2</sub> O] <sup>2+</sup> ·2e <sup>-</sup>    | 70.83         | 13865.01    | 38.03                 |
|                                    | ea-Pt/a-TiO <sub>x</sub> /<br>[Ti <sub>2</sub> O] <sup>2+</sup> ·2e <sup>-</sup> | 70.73         | 4689.42     | 74.44                 |

**Table S4** Quantitative analysis for ICP-OES result of the ea-Pt/a-TiO<sub>x</sub>/[Ti<sub>2</sub>O]<sup>2+</sup>·2e<sup>-</sup>.

|                           | Ti   | Pt  |
|---------------------------|------|-----|
| Relative amount<br>(wt.%) | 88.5 | 0.7 |

**Table S5** The detailed compositions of ref. MEA, MEA #1 and MEA #2 with specific formulations of each catalyst ink.

| MEA                                  | ref. MEA                    | MEA #1                                                                                               | MEA #2                                                                                                                       |
|--------------------------------------|-----------------------------|------------------------------------------------------------------------------------------------------|------------------------------------------------------------------------------------------------------------------------------|
| Catalyst                             | 20 wt.% Pt/C<br>(50mg)      | 0.7 wt.% ea-Pt/a-<br>TiO <sub>x</sub> /[Ti <sub>2</sub> O] <sup>2+</sup> ·2e <sup>-</sup><br>(50 mg) | 0.7 wt.% ea-Pt/a-<br>TiO <sub>x</sub> /[Ti <sub>2</sub> O] <sup>2+</sup> ·2e <sup>-</sup> (25 mg)<br>+ Vulcan Carbon (25 mg) |
| DI Water                             | 500 μL                      | 500 μL                                                                                               | 500 μL                                                                                                                       |
| IPA                                  | 2500 μL                     | 2500 μL                                                                                              | 2500 μL                                                                                                                      |
| Ionomer Solution<br>(5 wt.% QPC-TMA) | 320 mg<br>(= 16 mg Ionomer) | 380 mg<br>(= 19 mg Ionomer)                                                                          | 390 mg<br>(= 19.5 mg Ionomer)                                                                                                |

**Table S6** The detailed components of ref. MEA, MEA #1 and MEA #2.

| MEA         | ref. MEA                                                                               | MEA #1                                                                                                                                                              | MEA #2                                                                                                                                                                                                                               |
|-------------|----------------------------------------------------------------------------------------|---------------------------------------------------------------------------------------------------------------------------------------------------------------------|--------------------------------------------------------------------------------------------------------------------------------------------------------------------------------------------------------------------------------------|
| Anode PTL   | Carbon Paper w/ MPL (JNT-30-A3)                                                        |                                                                                                                                                                     |                                                                                                                                                                                                                                      |
| Anode       | 60 wt.% PtRu/C ( $0.4 \text{ mg}_{\text{PtRu}} \text{ cm}^{-2}$ ) Ionomer = QPC-TMA    |                                                                                                                                                                     |                                                                                                                                                                                                                                      |
| Membrane    | QPC-TMA (50 $\mu\text{L}$ )                                                            |                                                                                                                                                                     |                                                                                                                                                                                                                                      |
| Cathode     | 20 wt.% Pt/C<br>( $0.05 \text{ mg}_{\text{Pt}} \text{ cm}^{-2}$ )<br>Ionomer = QPC-TMA | 0.7 wt.% ea-Pt/a-<br>TiO <sub>x</sub> /[Ti <sub>2</sub> O] <sup>2+</sup> ·2e <sup>-</sup><br>( $0.01 \text{ mg}_{\text{Pt}} \text{ cm}^{-2}$ )<br>Ionomer = QPC-TMA | 0.7 wt.% ea-Pt/a-<br>TiO <sub>x</sub> /[Ti <sub>2</sub> O] <sup>2+</sup> ·2e <sup>-</sup><br>( $0.01 \text{ mg}_{\text{Pt}} \text{ cm}^{-2}$ )<br>+ Vulcan Carbon ( $1 \text{ mg}_{\text{C}} \text{ cm}^{-2}$ )<br>Ionomer = QPC-TMA |
| Cathode PTL | Carbon Paper w/ MPL (JNT-30-A3)                                                        |                                                                                                                                                                     |                                                                                                                                                                                                                                      |



**Table S7** Comparisons of the ORR performance both under the applied potential of 0.9 $V_{\text{RHE}}$  and 0.4  $V_{\text{RHE}}$  of recently published Pt nanostructure catalysts.

| Catalyst                                                                               | Electrolyte                | Mass activity <sup>a</sup><br>(0.9 $V_{\text{RHE}}$ ) | Mass activity <sup>b</sup><br>(0.4 $V_{\text{RHE}}$ ) | Specific activity <sup>a</sup><br>(0.9 $V_{\text{RHE}}$ ) | Specific activity <sup>b</sup><br>(0.4 $V_{\text{RHE}}$ ) | ECSA                           | Reference                                            |
|----------------------------------------------------------------------------------------|----------------------------|-------------------------------------------------------|-------------------------------------------------------|-----------------------------------------------------------|-----------------------------------------------------------|--------------------------------|------------------------------------------------------|
|                                                                                        |                            | A  mg <sub>Pt</sub> <sup>-1</sup>                     | A  mg <sub>Pt</sub> <sup>-1</sup>                     | mA cm <sup>-2</sup>                                       | mA cm <sup>-2</sup>                                       | m <sup>2</sup> g <sup>-1</sup> |                                                      |
| <b>ea-Pt/<br/>a-TiO<sub>x</sub>/<br/>[Ti<sub>2</sub>O]<sup>2+</sup>·2e<sup>-</sup></b> | <b>0.1 M<br/>KOH</b>       | <b>0.45</b>                                           | <b>3.1</b>                                            | <b>2.1</b>                                                | <b>14.2</b>                                               | <b>21.7</b>                    | <b>This work</b>                                     |
| Pt <sub>3</sub> Fe NW                                                                  | 0.1 M<br>HClO <sub>4</sub> | 2.11                                                  | 1.23                                                  | 4.34                                                      | 2.53                                                      | 34                             | <i>Adv. Mater.</i><br><b>2018</b> , 30, 1705515      |
| Ga-doped PtNi                                                                          | 0.1 M<br>HClO <sub>4</sub> | 1.24                                                  | 0.26                                                  | 2.53                                                      | 0.53                                                      | 49                             | <i>Nano Lett.</i><br><b>2018</b> , 18, 2450          |
| PtNi frame                                                                             | 0.1 M<br>HClO <sub>4</sub> | 1.51                                                  | 0.17                                                  | 2.05                                                      | 0.23                                                      | 73.4                           | <i>Nano Lett.</i><br><b>2018</b> , 18, 2930          |
| PtNi frame                                                                             | 0.1 M<br>HClO <sub>4</sub> | 0.24                                                  | 0.86                                                  | 0.44                                                      | 1.57                                                      | 54.8                           | <i>ACS Nano</i><br><b>2018</b> , 12, 8697            |
| Pt cube                                                                                | 0.1 M<br>HClO <sub>4</sub> | 0.43                                                  | 0.62                                                  | 1.77                                                      | 2.56                                                      | 24.5                           | <i>Mater. Today</i><br><b>2018</b> , 21, 834         |
| PtNiCo NW                                                                              | 0.1 M<br>HClO <sub>4</sub> | 4.2                                                   | 1.71                                                  | 5.11                                                      | 2.08                                                      | 82.2                           | <i>Sci. Adv.</i><br><b>2017</b> , 3, 1601705         |
| Rh-Pt NW                                                                               | 0.1 M<br>HClO <sub>4</sub> | 1.41                                                  | 0.35                                                  | 1.63                                                      | 0.41                                                      | 86.4                           | <i>J. Am. Chem. Soc.</i><br><b>2017</b> , 139, 8152  |
| PtPb/PtNi IM                                                                           | 0.1 M<br>HClO <sub>4</sub> | 1.92                                                  | 0.41                                                  | 5.16                                                      | 1.11                                                      | 37.2                           | <i>J. Am. Chem. Soc.</i><br><b>2017</b> , 139, 9576  |
| PtNiPd NW                                                                              | 0.1 M<br>HClO <sub>4</sub> | 1.93                                                  | 0.57                                                  | 3.48                                                      | 1.03                                                      | 55.4                           | <i>Adv. Mater.</i><br><b>2017</b> , 29, 1603774      |
| Pt <sub>3</sub> Co NW                                                                  | 0.1 M<br>HClO <sub>4</sub> | 3.71                                                  | 0.91                                                  | 7.12                                                      | 1.75                                                      | 52.1                           | <i>Nat. Commun.</i><br><b>2016</b> , 7, 11850        |
| Jagged Pt NW                                                                           | 0.1 M<br>HClO <sub>4</sub> | 13.6                                                  | 2.61                                                  | 11.5                                                      | 2.21                                                      | 118                            | <i>Science</i><br><b>2016</b> , 354, 1414            |
| PtPb/Pt plate                                                                          | 0.1 M<br>HClO <sub>4</sub> | 4.3                                                   | 0.94                                                  | 7.8                                                       | 1.7                                                       | 55.1                           | <i>Science</i><br><b>2016</b> , 354, 1410            |
| Mo-Pt <sub>3</sub> Ni                                                                  | 0.1 M<br>HClO <sub>4</sub> | 6.98                                                  | 1.4                                                   | 10.3                                                      | 2.06                                                      | 67.5                           | <i>Science</i><br><b>2015</b> , 348, 1230            |
| Pt Nanocage                                                                            | 0.1 M<br>HClO <sub>4</sub> | 1.28                                                  | 0.53                                                  | 3.5                                                       | 1.44                                                      | 36.6                           | <i>Nano Lett.</i><br><b>2016</b> , 16, 1467          |
| Pt Nanocage                                                                            | 0.1 M<br>HClO <sub>4</sub> | 0.75                                                  | 0.45                                                  | 1.98                                                      | 1.19                                                      | 38.2                           | <i>Science</i><br><b>2015</b> , 349, 412             |
| Pd@Pt NP                                                                               | 0.1 M<br>HClO <sub>4</sub> | 1.6                                                   | 0.73                                                  | 1.66                                                      | 0.76                                                      | 96.4                           | <i>J. Am. Chem. Soc.</i><br><b>2015</b> , 137, 15036 |
| PtNi thin film                                                                         | 0.1 M<br>HClO <sub>4</sub> | 0.216                                                 | 0.09                                                  | 2.4                                                       | 1.01                                                      | 9                              | <i>Nat. Mater.</i><br><b>2012</b> , 11, 1051         |
| Rh-PtNi                                                                                | 0.1 M<br>HClO <sub>4</sub> | 1.14                                                  | 0.36                                                  | -                                                         | -                                                         | -                              | <i>Nano Lett.</i><br><b>2016</b> , 16, 1719          |

|                                      |                                      |       |      |       |      |       |                                                        |
|--------------------------------------|--------------------------------------|-------|------|-------|------|-------|--------------------------------------------------------|
| Pt Nanotube                          | 0.1 M HClO <sub>4</sub>              | 0.5   | 0.2  | 1.48  | 0.59 | 34.2  | <i>J. Am. Chem. Soc.</i> <b>2016</b> , 138, 6332       |
| PtNi-NiB NP                          | 0.1 M HClO <sub>4</sub>              | 5.3   | 0.91 | 9.05  | 1.55 | 59    | <i>Nat. Commun.</i> <b>2016</b> , 7, 12362             |
| Pt Nanocages                         | 0.1 M HClO <sub>4</sub>              | 1.12  | 0.34 | 2.48  | 0.76 | 45.2  | <i>J. Am. Chem. Soc.</i> <b>2016</b> , 138, 1494       |
| Pd@Pt <sub>1.8</sub> Ni NP           | 0.1 M HClO <sub>4</sub>              | 0.79  | 0.43 | 0.45  | 0.25 | -     | <i>J. Am. Chem. Soc.</i> <b>2015</b> , 137, 2804       |
| PtCu OFAs                            | 0.1 M HClO <sub>4</sub>              | 3.26  | 0.76 | 5.98  | 1.39 | 54.5  | <i>Adv. Mater.</i> <b>2017</b> , 29, 1601687           |
| L1 <sub>0</sub> -CoPt/Pt             | 0.1 M HClO <sub>4</sub>              | 2.26  | 0.25 | 8.26  | 0.92 | 27.3  | <i>Joule</i> <b>2019</b> , 3, 124                      |
| LP@PF-2                              | 0.1 M HClO <sub>4</sub>              | 12.36 | 3.81 | -     | -    | -     | <i>Science</i> <b>2018</b> , 362, 1276                 |
| PtNi-BNCs                            | 0.1 M HClO <sub>4</sub>              | 3.52  | 1.28 | 5.16  | 1.88 | 68.2  | <i>Science</i> <b>2019</b> , 366, 850                  |
| Pt/DPC                               | 0.1 M HClO <sub>4</sub>              | -     | 0.07 | 1.76  | 5.84 | -     | <i>Electrocatalysis</i> <b>2020</b> , 11, 497          |
| Pt/NGC                               | 0.1 M HClO <sub>4</sub>              | -     | 0.08 | -     | -    | -     | <i>Adv. Energy Mater.</i> <b>2021</b> , 11, 2101050    |
| Pt <sub>4.8</sub> Fe/PCNF            | 0.1 M HClO <sub>4</sub>              | -     | 0.08 | -     | -    | 70.2  | <i>Int. J. Hydrogen Energy</i> <b>2019</b> , 44, 18083 |
| Pt/SnO <sub>2</sub> -CNT             | 0.1 M HClO <sub>4</sub>              | 0.07  | 0.19 | 0.25  | 0.67 | -     | <i>J. Electroanal. Chem.</i> <b>2021</b> , 896, 115147 |
| Pt@NiNC                              | 0.5 M H <sub>2</sub> SO <sub>4</sub> | 0.03  | 0.2  | 0.03  | 0.19 | 102.9 | <i>Catal. Sci. Technol.</i> <b>2020</b> , 10, 65       |
| Pt/CNF-1300-0.28Mn                   | 0.1 M HClO <sub>4</sub>              | 0.12  | 0.25 | 0.31  | 0.63 | -     | <i>New J. Chem.</i> <b>2021</b> , 45, 14608            |
| M-PtTe <sub>2</sub>                  | 0.1 M KOH                            | 0.2   | 0.26 | -     | -    | -     | <i>ACS Energy Lett.</i> <b>2021</b> , 6, 3481          |
| Pt-TNT/FAB                           | 0.1 M HClO <sub>4</sub>              | 0.04  | 0.28 | 0.075 | 0.56 | 49.6  | <i>Int. J. Hydrogen Energy</i> <b>2019</b> , 44, 4745  |
| PtCM100-A900                         | 0.1 M HClO <sub>4</sub>              | 0.02  | 0.34 | -     | -    | -     | <i>ChemElectroChem</i> <b>2018</b> , 5, 62             |
| Pt-Mn <sub>3</sub> O <sub>4</sub> /C | 0.5 M H <sub>2</sub> SO <sub>4</sub> | 0.18  | 0.35 | 0.08  | 0.16 | 135.3 | <i>J. Electroanal. Chem.</i> <b>2017</b> , 794, 164    |

<sup>a</sup> The data was adapted from the Table. S1 in the reference 6.

<sup>b</sup> The data is not given in the references, but excavated from the ORR polarization curves.

**Table S8** Comparisons of the ORR performance under alkaline electrolyte at the applied potential of 0.9 V<sub>RHE</sub> and 0.4 V<sub>RHE</sub> of recently published Pt nanostructure catalysts.

| Catalyst                                                                     | Electrolyte      | Mass activity (0.9 V <sub>RHE</sub> ) | Mass activity (0.4 V <sub>RHE</sub> ) | Specific activity (0.9 V <sub>RHE</sub> ) | Specific activity (0.4 V <sub>RHE</sub> ) | ECSA                           | Onset potential  | Half-wave potential | Electron transfer number | Reference                                                  |
|------------------------------------------------------------------------------|------------------|---------------------------------------|---------------------------------------|-------------------------------------------|-------------------------------------------|--------------------------------|------------------|---------------------|--------------------------|------------------------------------------------------------|
|                                                                              |                  | A  mg <sub>Pt</sub> <sup>-1</sup>     | A  mg <sub>Pt</sub> <sup>-1</sup>     | mA cm <sup>-2</sup>                       | mA cm <sup>-2</sup>                       | m <sup>2</sup> g <sup>-1</sup> | V <sub>RHE</sub> | V <sub>RHE</sub>    | N/A                      |                                                            |
| <b>ea-Pt/a-TiO<sub>x</sub>/[Ti<sub>2</sub>O]<sup>2+</sup>·2e<sup>-</sup></b> | <b>0.1 M KOH</b> | <b>0.45</b>                           | <b>3.1</b>                            | <b>2.1</b>                                | <b>14.2</b>                               | <b>21.7</b>                    | <b>0.90</b>      | <b>0.82</b>         | <b>3.92~3.97</b>         | <b>This work</b>                                           |
| Ni-HIF Pt                                                                    | 0.1 M KOH        | 3.35                                  | 1.31                                  | 5.11                                      | 3.48                                      | 61.57                          | 0.96             | 0.90                | 3.88~3.98                | <i>Nano Energy</i> <b>2022</b> , 103, 107800               |
| Pt aer-[MTBD] [PFSI]                                                         | 0.1 M KOH        | 0.581                                 | 0.16                                  | 0.881                                     | 0.34                                      | 65.9                           | 1.024            | 0.934               |                          | <i>ACS Appl. Mater. Interfaces</i> <b>2023</b> , 15, 21143 |
| Pt@N,F-HCS                                                                   | 0.1 M KOH        | 1.76                                  | 1.50                                  | 2.73                                      | 15.74                                     | 64.3                           | 0.98             | 0.84                | 4.0                      | <i>J. Mater. Chem. A</i> , <b>2023</b> , 11, 4319          |
| Pt-Ni-Ir yolk-shell                                                          | 1 M KOH          | 0.391                                 | 0.18                                  | 0.961                                     | 0.77                                      | 42                             | 0.97             | 0.918               |                          | <i>Nanoscale</i> <b>2019</b> , 11, 23206                   |
| Pt <sub>3</sub> Ni/CA                                                        | 0.1 M KOH        | 0.25                                  | 0.042                                 | 0.469                                     | 0.084                                     | 59.1                           | 0.98             | 0.94                |                          | <i>J. Solid State Electr.</i> <b>2022</b> , 26, 481        |
| Pt-Cu-Mn UNFs                                                                | 0.1 M KOH        | 1.45                                  | 0.49                                  | 3.38                                      | 1.73                                      | 43                             | 0.96             | 0.92                |                          | <i>Adv. Funct. Mater.</i> <b>2020</b> , 30, 1910107        |
| Au <sub>1.68</sub> Pt/MWNTs                                                  | 0.1 M KOH        | 0.295                                 | 0.19                                  | 0.16                                      | 0.28                                      | 184.5                          | 0.95             | 0.89                | 3.8~4.0                  | <i>Appl. Surf. Sci.</i> <b>2021</b> , 564, 150474          |
| 20Pt/SGCN-550                                                                | 0.1 M KOH        | 0.68                                  | 0.25                                  | 1.49                                      | 0.86                                      | 46.2                           |                  | 0.91                | 4.0                      | <i>ACS Catal.</i> <b>2022</b> , 12, 7406                   |

## References

- 1 C. T. Dinh, A. Jain, F. P. G. de Arquer, P. D. Luan, J. Li, N. Wang, X. Zheng, J. Cai, B. Z. Gregory, O. Voznyy, B. Zhang, M. Liu, D. Sinton, E. J. Crumlin and E. H. Sargent, *Nat. Energy*, 2019, **4**, 107–114.
- 2 B. Ravel and M. Newville, *J. Synchrotron Rad.*, 2005, **12**, 537–541.
- 3 L. Gao, T. Sun, X. Tan, M. Liu, F. Xue, B. Wang, J. Zhang, Y. F. Lu, C. Ma, H. Tian, S. Yang, S. C. Smith and H. Huang, *Appl. Catal., B*, 2022, **303**, 120918.
- 4 M. Luo and M. T. M. Koper, *Nat. Catal.*, 2022, **5**, 615–623.
- 5 L. Zhang, J. M. T. A. Fischer, Y. Jia, X. Yan, W. Xu, X. Wang, J. Chen, D. Yang, H. Liu, L. Zhuang, M. Hankel, D. J. Searles, K. Huang, S. Feng, C. L. Brown and X. Yao, *J. Am. Chem. Soc.*, 2018, **140**, 10757–10763.
- 6 H. Dong, J. Liang, Y. Wang, Z. Xu, Q. Liu, Y. Luo, T. Li, L. Li, X. Shi, A. M. Asiri, Q. Li, D. Ma, and X. Sun, *Angew. Chem. Int. Ed.*, 2021, **60**, 10583–10587.
- 7 Z. Yang, C. Zhao, Y. Qu, H. Zhou, F. Zhou, J. Wang, Y. Wu and Y. Li, *Adv. Mater.*, 2019, **31**, 1808043.
- 8 M. S. Cha, J. E. Park, S. Kim, S. H. Han, S. H. Shin, S. H. Yang, T. H. Kim, D. M. Yu, S. So, Y. T. Hong, S. J. Yoon, S. G. Oh, S. Y. Kang, O. H. Kim, H. S. Park, B. Bae, Y. E. Sung, Y. H. Cho and J. Y. Lee, *Energy Environ. Sci.*, 2020, **13**, 3633–3645.
- 9 G. Kresse and J. Furthmuller, *Comp. Mater. Sci.*, 1996, **6**, 15–50.
- 10 G. Kresse and J. Furthmuller, *Phys. Rev. B*, 1996, **54**, 11169–11186.
- 11 G. Kresse and D. Joubert, *Phys. Rev. B*, 1999, **59**, 1758–1775.
- 12 J. P. Perdew, K. Burke and M. Ernzerhof, *Phys. Rev. Lett.*, 1996, **77**, 3865–3868.
- 13 H. J. Monkhorst and J. D. Pack, *Phys. Rev. B*, 1976, **13**, 5188–5192.

- 14 K. Chung, J. Bang, A. Thacharon, H. Y. Song, S. H. Kang, W. S. Jang, N. Dhull, D. Thapa, C. M. Ajmal, B. Song, S. G. Lee, Z. Wang, A. Jetybayeva, S. Hong, K. H. Lee, E. J. Cho, S. Baik, S. H. Oh, Y. M. Kim, Y. H. Lee, S. G. Kim and S. W. Kim, *Nat. Nanotechnol.*, 2022, **17**, 285–291.
- 15 Z. Zhang, S. Liu, X. Tian, J. Wang, P. Xu, F. Xiao and S. Wang, *J. Mater. Chem. A*, 2017, **5**, 10876–10884.
- 16 X. Han, X. Wu, C. Zhong, Y. Deng, N. Zhao and W. Hu, *Nano Energy*, 2017, **31**, 541–550.
- 17 X. Han, F. Cheng, T. Zhang, J. Yang, Y. Hu and J. Chen, *Adv. Mater.*, 2014, **26**, 2047–2051.
- 18 Z. Hu, Z. Zhang, Z. Li, M. Dou and F. Wang, *ACS Appl. Mater. Interfaces*, 2017, **9**, 16109–16116.
